# Supplementary material for: Wnt11 directs nephron progenitor polarity and motile behavior ultimately determining nephron endowment
Source: eLife. 2018 Dec 5;7:e40392. doi: 10.7554/eLife.40392 (PMC6281319; doi:10.7554/eLife.40392)
Supplement: Figure 1—source data 1. [file elife-40392-fig1-data1.xlsx]

## Sheet: Tips
	Filename	Top	Bottom	Total Tips		Filename	Top	Bottom	Total Tips		Filename	Top	Bottom	Total Tips
	P0 Wnt11KO HET 1X Obj X1 1	1678	1777	3455		P0 Wnt11KO HOM 1X Obj X1 1	783	1001	1784		P0 Wnt11KO WT 1X Obj X1 1	1460	1654	3114
	P0 Wnt11KO HET 1X Obj X1 2	1274	1541	2815		P0 Wnt11KO HOM 1X Obj X1 2	807	945	1752		P0 Wnt11KO WT 1X Obj X1 2	1329	1561	2890
	P0 Wnt11KO HET 1X Obj X1 3	1304	1463	2767		P0 Wnt11KO HOM 1X Obj X1 3	1144	1063	2207		P0 Wnt11KO WT 1X Obj X1 3	1396	1547	2943
	P0 Wnt11KO HET 1X Obj X1 4	1456	1280	2736		P0 Wnt11KO HOM 1X Obj X1 4	919	844	1763		P0 Wnt11KO WT 1X Obj X1 4	1422	1411	2833
	P0 Wnt11KO HET 1X Obj X1 5	1654	1516	3170		P0 Wnt11KO HOM 1X Obj X1 5	779	738	1517		P0 Wnt11KO WT 1X Obj X1 5	1383	1490	2873
	P0 Wnt11KO HET 1X Obj X1 6	1426	1292	2718		P0 Wnt11KO HOM 1X Obj X1 6	827	700	1527		P0 Wnt11KO WT 1X Obj X1 6	1359	1368	2727
	P0 Wnt11KO HET 1X Obj X1 7	1448	1586	3034		P0 Wnt11KO HOM 1X Obj X1 7	710	521	1231		P0 Wnt11KO WT 1X Obj X1 7	1339	1553	2892
	P0 Wnt11KO HET 1X Obj X1 8	1266	1289	2555		P0 Wnt11KO HOM 1X Obj X1 8	712	880	1592		P0 Wnt11KO WT 1X Obj X1 8	1143	1279	2422
			AVG	2906.25				AVG	1671.62				AVG	2836.75
			SD	293.386				SD	282.686				SD	199.798
			SEM	103.728				SEM	99.9446				SEM	70.6394
	HET vs HOM					HOM vs WT					HET vs WT
TTEST	3.07147e-07				TTEST	2.05388e-07				TTEST	0.294803
	Search value	2906.25				Search value	1671.62				Search value	2836.75
	Closest value	2815				Closest value	1592				Closest value	2833
					% of	% Reduction
				HOM vs WT	58.9275	41.0725
				HOM vs HET	57.5183	42.4817
					AVG	41.7771

## Sheet: Lengths
	Filename	Length (µm)		Filename	Length (µm)		Filename	Length (µm)
	P0 Wnt11KO HET 1X Obj X1 1	2016		P0 Wnt11KO HOM 1X Obj X1 1	1717		P0 Wnt11KO WT 1X Obj X1 1	1894
	P0 Wnt11KO HET 1X Obj X1 2	1850		P0 Wnt11KO HOM 1X Obj X1 2	1712		P0 Wnt11KO WT 1X Obj X1 2	1740
	P0 Wnt11KO HET 1X Obj X1 3	1845		P0 Wnt11KO HOM 1X Obj X1 3	1634		P0 Wnt11KO WT 1X Obj X1 3	1790
	P0 Wnt11KO HET 1X Obj X1 4	1848		P0 Wnt11KO HOM 1X Obj X1 4	1681		P0 Wnt11KO WT 1X Obj X1 4	1910
	P0 Wnt11KO HET 1X Obj X1 5	1899		P0 Wnt11KO HOM 1X Obj X1 5	1498		P0 Wnt11KO WT 1X Obj X1 5	1834
	P0 Wnt11KO HET 1X Obj X1 6	1745		P0 Wnt11KO HOM 1X Obj X1 6	1431		P0 Wnt11KO WT 1X Obj X1 6	1731
	P0 Wnt11KO HET 1X Obj X1 7	1868		P0 Wnt11KO HOM 1X Obj X1 7	1469		P0 Wnt11KO WT 1X Obj X1 7	1782
	P0 Wnt11KO HET 1X Obj X1 8	1677		P0 Wnt11KO HOM 1X Obj X1 8	1467		P0 Wnt11KO WT 1X Obj X1 8	1640
	AVG	1843.5		AVG	1576.12		AVG	1790.12
	SD	100.659		SD	121.423		SD	89.2003
	SEM	35.5884		SEM	42.9295		SEM	31.5371
	HET vs HOM			HOM vs WT			HET vs WT
TTEST	0.000156557		TTEST	0.000747979		TTEST	0.140406
			% of	% Reduction
		HOM vs WT	88.0455	11.9545
		HOM vs HET	85.4963	14.5037
			AVG	13.2291

## Sheet: Volume
	Filename	Volume (µm3)		Filename	Volume (µm3)		Filename	Volume (µm3)
	P0 Wnt11KO HET 1X Obj X1 1	1447934400		P0 Wnt11KO HOM 1X Obj X1 1	783131080		P0 Wnt11KO WT 1X Obj X1 1	1280152600
	P0 Wnt11KO HET 1X Obj X1 2	1191274700		P0 Wnt11KO HOM 1X Obj X1 2	856748270		P0 Wnt11KO WT 1X Obj X1 2	1104612700
	P0 Wnt11KO HET 1X Obj X1 3	1176754700		P0 Wnt11KO HOM 1X Obj X1 3	847948310		P0 Wnt11KO WT 1X Obj X1 3	1228792000
	P0 Wnt11KO HET 1X Obj X1 4	1225720300		P0 Wnt11KO HOM 1X Obj X1 4	901045050		P0 Wnt11KO WT 1X Obj X1 4	1293472900
	P0 Wnt11KO HET 1X Obj X1 5	1260197600		P0 Wnt11KO HOM 1X Obj X1 5	724707390		P0 Wnt11KO WT 1X Obj X1 5	1240488200
	P0 Wnt11KO HET 1X Obj X1 6	1283612300		P0 Wnt11KO HOM 1X Obj X1 6	618590670		P0 Wnt11KO WT 1X Obj X1 6	1215131000
	P0 Wnt11KO HET 1X Obj X1 7	1297045900		P0 Wnt11KO HOM 1X Obj X1 7	622693510		P0 Wnt11KO WT 1X Obj X1 7	1163315500
	P0 Wnt11KO HET 1X Obj X1 8	1079355200		P0 Wnt11KO HOM 1X Obj X1 8	598769190		P0 Wnt11KO WT 1X Obj X1 8	1024685800
	AVG	1.24524e+09		AVG	7.44204e+08		AVG	1.19383e+09
	SD	1.07548e+08		SD	1.20486e+08		SD	9.16e+07
	SEM	3.8024e+07		SEM	4.25983e+07		SEM	3.23855e+07
	HET vs HOM			HOM vs WT			HET vs WT
TTEST	2.53033e-07		TTEST	6.28057e-07		TTEST	0.160634
			% of	% Reduction
		HOM vs WT	62.3375	37.6625
		HOM vs HET	59.7641	40.2359
			AVG	38.9492
