# Supplementary material for: Wnt11 directs nephron progenitor polarity and motile behavior ultimately determining nephron endowment
Source: eLife. 2018 Dec 5;7:e40392. doi: 10.7554/eLife.40392 (PMC6281319; doi:10.7554/eLife.40392)
Supplement: Figure 2—source data 1. [file elife-40392-fig2-data1.xlsx]

## Sheet: Exp 2
Block Code	Block Position	LO Code_(Decode)	SSF	Q-	Nglom	Ps	Vkid (mm3)	Pkid	Pglom	Pcorp	Nglom/ Vkid	Pglom/Pkid	Pcorp/Pkid	Vglom x10-4 mm3	Vcorp x10-4 mm3	Total Vglom mm3	Total Vcorp mm3
Lori O'Brien E	Left	16_(MUT)	100	318	7950	178	60.5374	12203	105	183	131.324	0.00860444	0.0149963	0.655209	1.14194	0.520891	0.907838
Lori O'Brien E	Middle	10_(HET)	100	785	19625	251	85.3646	16156	197	377	229.896	0.0121936	0.023335	0.530396	1.01502	1.0409	1.99198
Lori O'Brien E	Right	6_(WT)	100	716	17900	275	93.5269	18845	182	366	191.389	0.00965773	0.0194216	0.504614	1.01477	0.903258	1.81644
Lori O'Brien F	Left	12_(HET)	100	600	15000	189	64.2785	13039	136	281	233.359	0.0104302	0.0215507	0.446961	0.923499	0.670441	1.38525
Lori O'Brien F	Middle	17_(MUT)	100	441	11025	201	68.3597	13354	125	210	161.279	0.00936049	0.0157256	0.58039	0.975056	0.63988	1.075
Lori O'Brien F	Right	18_(MUT)	100	315	7875	160	54.4157	10123	89	174	144.719	0.00879186	0.0171886	0.607511	1.18772	0.478415	0.935328
Lori O'Brien G	Left	14_(MUT)	100	284	7100	98	33.3296	6852	109	176	213.024	0.0159078	0.0256859	0.74676	1.20578	0.530199	0.856102
Lori O'Brien G	Middle	8_(HET)	100	709	17725	179	60.8775	15664	222	315	291.158	0.0141726	0.0201098	0.486767	0.690683	0.862795	1.22424
Lori O'Brien G	Right	5_(WT)	100	606	15150	245	83.324	16945	187	293	181.82	0.0110357	0.0172912	0.606956	0.951007	0.919539	1.44078
Lori O'Brien H	Left	4_(WT)	100	697	17425	214	72.781	11206	148	207	239.417	0.0132072	0.0184722	0.551641	0.771551	0.961234	1.34443
Lori O'brien H	Middle	11_(HET)	100	761	19025	179	60.8775	12405	196	292	312.513	0.0158001	0.0235389	0.505582	0.753214	0.96187	1.43299
Lori O'Brien H	Right	3_(WT)	100	793	19825	177	60.1973	9268	163	215	329.333	0.0175874	0.0231981	0.53403	0.704396	1.05871	1.39646
Lori O'Brien I	Left	15_(MUT)	100	385	9625	114	38.7712	7461	128	182	248.251	0.0171559	0.0243935	0.691069	0.982613	0.665153	0.945765
Lori O'Brien I	Middle	1_(WT)	100	730	18250	137	46.5934	7569	137	189	391.686	0.0181001	0.0249703	0.462108	0.637507	0.843348	1.16345
Lori O'Brien I	Right	9_(HET)	100	603	15075	156	53.0553	13406	179	268	284.138	0.0133522	0.019991	0.469921	0.703569	0.708406	1.06063
Lori O'Brien J	Left	13_(MUT)	100	389	9725	136	46.2533	7259	104	159	210.255	0.014327	0.0219038	0.681412	1.04177	0.662673	1.01313
Lori O'Brien J	Middle	2_(WT)	100	749	18725	188	63.9384	9854	162	203	292.86	0.01644	0.0206008	0.561361	0.703434	1.05115	1.31718
Lori O'Brien J	Right	7_(HET)	100	687	17175	164	55.7761	11368	169	268	307.928	0.0148663	0.0235749	0.482785	0.7656	0.829183	1.31492
