# Supplementary material for: Wnt11 directs nephron progenitor polarity and motile behavior ultimately determining nephron endowment
Source: eLife. 2018 Dec 5;7:e40392. doi: 10.7554/eLife.40392 (PMC6281319; doi:10.7554/eLife.40392)
Supplement: Figure 3—source data 1. [file elife-40392-fig3-data1.xls]

## Sheet: Sheet1
Imaging date	Original Image file name	Imaris file name	Tip no.	Tip type: single ampulla, T-tip, tri-tip	comments	tip volume (um3)	No. Dapi+ tip cells	cap volume (um3)	No. Six2+ cells	ratio cap cells/tip cells	RV	C/S	Stage 4	Total	Comments
2013-05-21	LORI A Female Six2 CytoK DAPI X40 1	155-A-F1	1	T		26800	162	52970	385	2.37654	1	1	0	2			Summary data
			2	Ampulla		19949	136	41251	385	2.83088	0	1	0	1			Group	Tip vol all	sem	Cap vol all	sem	Tip cells/niche all	sem	Six2 cells/niche all	sem	samples	cap/tip pairs
			3	Ampulla		10510	67	20813	156	2.32836	0	0	1	1			A	29838.4	2894.07	41389.7	3318.6	162.692	13.4286	365.1	22.6444	6	36
			4	Ampulla		14736	93	28171	223	2.39785	0	1	0	1			C	33577.6	2370.97	54281	3764.61	169.463	11.6544	430.902	23.4013	6	34
			5	Ampulla		17805	102	33666	282	2.76471	0	1	0	1			B	47928.2	5190.18	61097.6	5786.75	248.088	21.5286	465.529	35.3685	6	41
			6	T		40839	248	54057	422	1.70161	1	1	0	2
			7	T		43331	261	58800	436	1.6705	2	0	1	3
2013-05-21	LORI A Female Six2 CytoK DAPI X40 2	155-A-F2	1	Ampulla		28455	173	61894	339	1.95954	1	1	0	2			Group	Tip vol	sem	Cap vol	sem	Tip cells/niche	sem	Six2 cells/niche	sem
			2	Ampulla		25290	165	42063	305	1.84848	0	1	0	1			A Female	25256.9	2263.01	46931.4	2932	158.684	12.0207	336.158	20.6521	3	19
			3	Ampulla		22845	145	37103	246	1.69655	0	1	0	1			A Male	34958.8	3306.52	51300	5144.25	174.412	17.5009	390.176	27.5683	3	17
			4	Early T		36171	221	47610	317	1.43439	1	0	1	2			B Female	51172.5	6416.43	64621.8	5871.26	271.75	24.2576	506.125	45.0664	3	16
			5	Ampulla		29171	201	45243	301	1.49751	0	1	0	1			B Male	45044.4	3626.45	48961.1	4509.38	227.056	16.8202	429.444	20.0692	3	18
			6	Ampulla		23003	141	37911	263	1.86525	0	1	0	1			C Female	33090.6	1956.44	50988.6	2133.8	171.522	9.6344	413.609	16.0207	3	23
2013-05-21	LORI A Female Six2 CytoK DAPI X40 3	155-A-F3	1	Ampulla		16484	94	41310	276	2.93617	0	0	1	1			C Male	34200	3245.2	58488	5764.09	166.833	15.9419	453	34.2173	3	18
			2	Ampulla		22172	122	50180	321	2.63115	1	0	0	1
			3	Early T		37925	205	70800	508	2.47805	1	1	0	2					T Tests						Assumption
			4	Early T	Partialtip/cap (most there but potentially a bit missing)	7132	168	59822	449	2.67262	1	0	0	1				Group	Tip vol	Cap vol	Tip cells/niche	Six2 cells/niche			A = Wt
			5	Ampulla		31270	168	63025	451	2.68452	0	1	0	1			Wt to KO	A to B	#NAME?	0.049836	0.000387248	0.00249935			C = Het
			6	Ampulla		25993	143	45008	322	2.25175	2	0	0	2			Het to KO	B to C	0.0148837	0.0418424	0.00104007	0.0682506			B = Ko
2013-05-21	LORI A Male Six2 CytoK DAPI X40 1	155-A-M1	1	Ampulla		23200	102	37700	239	2.34314	1	0	0	1			Wt to Het	A to C	0.0126395	0.270995	0.410111	0.00539672
			2	Ampulla		25900	112	52600	331	2.95536	0	1	0	1
			3	Ampulla		45500	195	80300	473	2.42564	1	1	0	2
			4	Ampulla		37400	175	80800	442	2.52571	0	1	1	2
			5	Ampulla		21700	112	57200	359	3.20536	0	0	1	1
2013-05-21	LORI A Male Six2 CytoK DAPI X40 2	155-A-M2	1	Ampulla		44600	226	64900	569	2.5177	1	1	0	2
			2	Ampulla		26700	145	43800	395	2.72414	0	1	0	1
			3	Ampulla		25000	141	39700	330	2.34043	0	1	0	1
			4	Early T		36500	183	75000	513	2.80328	1	1	0	2
			5	Early T		29400	156	49100	416	2.66667	1	0	1	2
			6	Early T		32300	168	26600	499	2.97024	0	1	1	2
2013-05-21	LORI A Male Six2 CytoK DAPI X40 3	155-A-M3	1	Ampulla		29100	155	22200	232	1.49677	1	0	0	1
			2	Ampulla		32900	156	35100	293	1.87821	0	1	0	1
			3	Ampulla		27300	139	24200	222	1.59712	0	0	1	1
			4	Ampulla		41500	212	47100	318	1.5	0	1	0	1
			5	Ampulla		35400	166	42400	417	2.51205	1	0	0	1
			6	T		79900	422	93400	585	1.38626	1	1	1	3
				Group A	AVG	29838.4	162.692	41389.7	365.1	2.27429	0.527778	0.638889	0.277778	1.44444
					Stdev	12614.9	58.534	14465.4	98.7045	0.522809	0.608798	0.487136	0.454257	0.606839			0.05	*
					SEM	2894.07	13.4286	3318.6	22.6444	0.119941	0.139668	0.111757	0.104214	0.139218			0.01	**
2013-05-21	LORI B Female Six2 CytoK DAPI X40 1	155-B-F1	1	Ampulla		44043	213	71829	504	2.3662	2	1	0	3			0.001	***
			2	T		69989	319	80271	572	1.7931	2	1	1	4
			3	T		71338	357	95623	709	1.98599	0	1	1	2	*+ 1RV attached to stalk
			4	Ampulla		47232	233	47187	357	1.53219	2	1	0	3
			5	Elongated T/Tri/Ampulla covered by single cap		121130	469	104367	774	1.65032	2	2	1	5
2013-05-21	LORI B Female Six2 CytoK DAPI X40 2	155-B-F2	1	T		56079	294	56133	434	1.47619	1	0	1	2
			2	Ampulla		52934	252	45116	400	1.5873	0	1	1	2
			3	T		56456	300	70982	510	1.7	0	1	1	2
			4	Ampulla		46590	243	57924	431	1.77366	1	1	0	2
			5	Ampulla		39746	204	35892	294	1.44118	2	0	1	3
			6	Ampulla		25893	143	28590	219	1.53147	1	0	1	2
2013-05-21	LORI B Female Six2 CytoK DAPI X40 3	155-B-F3	1	T		67118	370	85581	741	2.0027	2	1	1	4
			2	T		58746	328	73291	603	1.83841	1	1	1	3
			3	T		12196	367	95467	803	2.18801	1	1	0	2
			4	Ampulla		18518	106	37557	301	2.83962	1	1	0	2
			5	Ampulla		30752	150	48138	446	2.97333	1	1	0	2
2013-05-21	LORI B Male Six2 CytoK DAPI X40 1	155-B-M1	1	Ampulla	cap could be under represented	33300	170	26200	311	1.82941	1	1	0	2
			2	Ampulla		64000	321	53800	493	1.53583	0	1	1	2
			3	Ampulla	cap could be under represented	32200	169	38400	359	2.12426	0	1	0	1
			4	Ampulla		46500	226	53700	422	1.86726	1	1	0	2
			5	Ampulla		57500	283	48900	432	1.5265	2	0	1	3
			6	T		63500	330	89200	580	1.75758	2	0	1	3
2013-05-21	LORI B Male Six2 CytoK DAPI X40 2	155-B-M2	1	Ampulla		26100	143	38600	357	2.4965	0	1	0	1
			2	Ampulla		18000	98	26600	426	4.34694	1	0	0	1
	*Tri tip with long extension between last branch		3	Ampulla		22800	110	17800	254	2.30909	1	0	0	1
			4	T		47700	256	61300	437	1.70703	1	0	1	2
			5	Ampulla		29100	184	38000	386	2.09783	1	0	1	2
			6	T		47900	256	36000	565	2.20703	1	1	0	2
2013-05-21	LORI B Male Six2 CytoK DAPI X40 3	155-B-M3	1	Ampulla		54500	263	51200	405	1.53992	1	1	0	2
			2	Ampulla		70300	328	39700	477	1.45427	0	2	1	3
	*One weird tip and nephron ? abnormally expanded under tip		3	Ampulla		61000	294	67700	526	1.78912	0	1	1	2
			4	Ampulla		49600	232	58700	383	1.65086	3	0	1	4
			5	Ampulla		42500	212	49500	408	1.92453	1	0	1	2
			6	Ampulla		44300	212	86000	509	2.40094	1	1	0	2
				Group B	AVG	47928.2	248.088	61097.6	465.529	1.91748	1.05882	0.735294	0.558824	2.6875
					Stdev	20760.7	86.1142	23147	141.474	0.464816	0.776206	0.567227	0.503995	0.946485
					SEM	5190.18	21.5286	5786.75	35.3685	0.116204	0.194051	0.141807	0.125999	0.236621
2013-05-21	LORI C Female Six2 CytoK DAPI X40 1	155-C-F1	1	T		58900	322	77400	625	1.94099	1	1	0	2
			2	Ampulla		27900	142	52200	418	2.94366	0	1	0	1
			3	Ampulla		26300	145	45700	353	2.43448	1	0	1	2
			4	Ampulla		31000	148	50900	399	2.69595	1	1	0	2
			5	Ampulla		36500	185	65500	521	2.81622	0	1	1	2
			6	Ampulla		29000	151	42600	345	2.28477	0	1	0	1
			7	T		46700	221	71500	547	2.47511	1	1	0	2
2013-05-21	LORI C Female Six2 CytoK DAPI X40 2	155-C-F2	1	T		48900	230	65000	523	2.27391	1	1	1	3
			2	Ampulla		25400	144	43100	361	2.50694	0	1	0	1
			3	Ampulla		28300	137	50000	415	3.0292	0	1	0	1
			4	Ampulla		29000	140	39000	341	2.43571	1	0	0	1
			5	Ampulla		31300	149	44000	359	2.4094	1	1	0	2
			6	Ampulla		26900	143	50300	398	2.78322	0	0	1	1
			7	Ampulla		28500	158	50900	425	2.68987	1	0	1	2
2013-05-21	LORI C Female Six2 CytoK DAPI X40 3	155-C-F3	1	Ampulla		24112	135	44670	346	2.56296	1	1	0	2
			2	Ampulla		23900	154	49523	398	2.58442	1	1	0	2
			3	Ampulla		34706	181	48950	410	2.26519	1	1	0	2
			4	Amp/early T		41716	222	54683	452	2.03604	2	0	0	2
			5	Ampulla		36893	192	45960	383	1.99479	0	1	0	1
			6	Ampulla		24388	134	34768	298	2.22388	1	0	0	1	T 2,0,1 = 3
			7	Ampulla		41215	202	50690	421	2.08416	1	0	1	2	Tri 1,1,1 = 3
			8	Ampulla		21173	112	42569	357	3.1875	1	0	0	1
			9	Amp/early T		38380	198	52825	418	2.11111	0	1	1	2
2013-05-21	LORI C Male Six2 CytoK DAPI X40 1	155-C-M1	1	Ampulla		23700	130	47600	423	3.25385	0	1	0	1
			2	Ampulla		26800	151	51100	423	2.80132	0	1	0	1
			3	Ampulla		22500	113	35700	304	2.69027	1	0	1	2
			4	Ampulla		25400	143	58200	422	2.95105	0	1	0	1
			5	T		52800	224	584	511	2.28125	1	1	0	2
			6	Tri		52400	271	95200	611	2.25461	1	1	0	2
2013-05-21	LORI C Male Six2 CytoK DAPI X40 2	155-C-M2	1	Ampulla		29600	149	49400	365	2.44966	1	1	0	2
			2	Ampulla		22100	107	45900	309	2.88785	1	0	0	1
			3	Amp/early T		39600	170	71200	526	3.09412	0	1	0	1
			4	Ampulla		27400	130	78700	444	3.41538	0	1	1	2
			5	Ampulla		18700	96	39600	285	2.96875	0	1	0	1
			6	Ampulla		26500	113	56100	335	2.9646	1	0	1	2
2013-05-21	LORI C Male Six2 CytoK DAPI X40 3	155-C-M3	1	T		64800	342	95500	714	2.08772	0	2	0	2
			2	T		53900	253	94100	761	3.00791	1	1	0	2
			3	T		40200	182	79000	603	3.31319	1	1	0	2
			4	Ampulla		19000	86	35900	246	2.86047	0	1	0	1
			5	Amp/early T		39000	187	55700	440	2.35294	0	2	0	2
			6	Ampulla		31200	156	63300	432	2.76923	0	0	1	1
				Group C	AVG	33577.6	169.463	54281	430.902	2.46824	0.585366	0.756098	0.268293	1.65217
					Stdev	11370.8	55.8924	18054.5	112.229	0.340143	0.546608	0.53761	0.448575	0.572768
					SEM	2370.97	11.6544	3764.61	23.4013	0.0709248	0.113976	0.112099	0.0935343	0.11943
																			RV	S/C Body	Stage 4	Total Nephric structures
																		A Female	0.578947	0.631579	0.210526	1.42105
																		B Female	1.1875	0.875	0.625	2.6875
																		C Female	0.695652	0.652174	0.304348	1.65217
																			SEM	SEM	SEM	SEM
																			0.158866	0.113697	0.0960917	0.13925
																			0.1875	0.125	0.125	0.236621
																			0.116517	0.101543	0.0981002	0.11943
																			T Tests
																		Group	RV	S/C Body	Stage 4	Total Nephric structures
																	Wt to KO	A to B	0.0189464	0.159447	0.013486	0.000104213
																	Het to KO	B to C	0.0346852	0.176094	0.0522862	0.000727812
																	Wt to Het	A to C	0.557477	0.89324	0.498429	0.142182
																			0.05	*
																			0.01	**
																			0.001	***

## Sheet: Nephron count ttest
	Wnt11 B	C57 13.5
	3	2
	4	2
	2	3
	3	3
	5	1
	2	2
	2	3
	2	2
	2	1
	3	1
	2	1
	4	2
	3	3
	2
	2
	2
		0.04534
