# Supplementary material for: Wnt11 directs nephron progenitor polarity and motile behavior ultimately determining nephron endowment
Source: eLife. 2018 Dec 5;7:e40392. doi: 10.7554/eLife.40392 (PMC6281319; doi:10.7554/eLife.40392)
Supplement: Figure 4—source data 1. [file elife-40392-fig4-data1.xlsx]

## Sheet: Export Summary
	This document was exported from Numbers. Each table was converted to an Excel worksheet. All other objects on each Numbers sheet were placed on separate worksheets. Please be aware that formula calculations may differ in Excel.
	Numbers Sheet Name	Numbers Table Name	Excel Worksheet Name
	Export Summary
		Table 1	Export Summary
	Sheet 1
		Table 1	Sheet 1

## Sheet: Recovered_Sheet1
	This document was exported from Numbers. Each table was converted to an Excel worksheet. All other objects on each Numbers sheet were placed on separate worksheets. Please be aware that formula calculations may differ in Excel.
	Numbers Sheet Name	Numbers Table Name	Excel Worksheet Name
	Sheet 1
		Table 1	Sheet 1

## Sheet: Sheet 1
	WT	tips		MUT	tips			WT	tips		MUT	tips			WT	tips		MUT	tips
	11	2		1	1			13	2		9	2			8	2		9	2					A1_1								B1_1
	15	2		7	2			11	1		7	2			18	2		5	2					1	9.983	0.56486		1	15.222	0.345947		1	13.344	0.320668		1	5.665	0.89444
	21	2		2	2			17	2		6	2			15	2		3	1					2	5.639			2	5.266			2	4.279			2	5.067
	16	2		2	2			11	2		5	1			17	2		8	2					3	5.02	0.770648		3	11.156	0.477142		3	5.947	0.862115		3	10.861	0.275665
	15	2		4	2			12	2		8	2			14	2		10	2					4	6.514			4	5.323			4	5.127			4	2.994
	12	2		7	2			14	2		7	2			8	2		7	3					5	3.065	0.55455		5	7.798	0.532316		5	10.471	0.500334		5	4.609	0.733131
	15	3		5	2			22	2		10	2			15	2		11	2					6	5.527			6	4.151			6	5.239			6	3.379
	18	2		5	1			21	4		5	2			20	2		5	2					7	5.771	0.719286		7	4.713	0.704063		7	8.831	0.484543		7	6.597	0.444899
	17	2		7	2			17	2		3	2			10	2		7	1					8	4.151			8	6.694			8	4.279			8	2.935
	18	2	7.51351	2	1			21	3		8	2			15	2		5	1					9	4.886	0.749616		9	8.791	0.577977		9	5.589	0.866166		9	8.018	0.409329
	14	2	6.97297	2	2			15	2		5	1			28	3		6	2					10	6.518			10	5.081			10	4.841			10	3.282
	15	2	7.13158	10	2			15	2		6	2			11	2		3	2					11	3.827	0.578184		11	6.847	0.8706		11	8.601	0.345541		11	5.904	0.700542
	20	2	2.36111	6	3			9	2		11	3			26	3		4	2					12	6.619			12	5.961			12	2.972			12	4.136
	15	2	3.61765	3	3			7	1		4	1			21	2		5	2					13	9.192	0.333442		13	8.668	0.464928		13	5.089	0.880527		13	10.122	0.434993
	16	2	3.42857	6	2			14	2		9	2			17	2		7	2					14	3.065			14	4.03			14	4.481			14	4.403
	19	2		9	3			6	2		9	2			5	2		11	3					15	5.711	0.830327		15	6.461	0.430429		15	7.085	0.948906		15	9.747	0.336719
	10	2		4	2			17	2		3	2			15	2		8	2					16	4.742			16	2.781			16	6.723			16	3.282
	11	2		3	2			16	2		8	2			8	2		6	2					17	3.878	0.480307		17	6.532	0.728873		17	7.524	0.951223		17	10.447	0.385757
	278	37	7.51351	85	36	2.36111		258	37	6.97297	123	34	3.61765		271	38	7.13158	120	35	3.42857				18	8.074			18	4.761			18	7.157			18	4.03
									0.277853	0.677508		7.20602	3.13578											19	4.792	0.922781		19	4.705	0.882253		19	6.192	0.957773		19	10.453	0.320195
Cell Mixing								p-value	0.000650883															20	5.193			20	4.151			20	6.465			20	3.347
MUT	FOXD1	Six2		WT	FOXD1	Six2		MUT	FOXD1	Six2	WT	FOXD1	Six2		MUT	FOXD1	Six2	WT	FOXD1	Six2				Total		6.504				6.01453		Total		7.1178				4.93567
A1_1	4	0			0	3		B1_1	0	2		3	2		C1_1	5	1		1	3
	5	0			3	1			3	1		1	3			1	2		2	2				A1_2								B1_2
	4	2			1	3			1	3		0	3			3	0		1	1				1	7.185	0.609047		1	10.025	0.422344		1	6.052	0.752148		1	16.445	0.205473
	4	1			0	5			0	3		2	2			4	3		4	1				2	4.376			2	4.234			2	4.552			2	3.379
	2	1			3	2			2	2		0	3			3	1		1	4				3	4.505	0.886349		3	11.387	0.35883		3	5.907	0.666667		3	10.38	0.440366
	2	2			0	4			0	4		1	4			1	4		1	5				4	3.993			4	4.086			4	3.938			4	4.571
	3	1			3	4			0	4		1	1			2	2		1	3				5	10.545	0.386724		5	7.369	0.428145		5	6.828	0.584798		5	12.248	0.339402
	1	3			1	2			1	3		0	2			3	1		1	4				6	4.078			6	3.155			6	3.993			6	4.157
	1	3			0	4			1	3		0	2			3	1		2	2				7	5.433	0.741763		7	6.219	0.56649		7	6.35	0.840472		7	10.811	0.307835
	2	3			3	3			2	2		0	3			2	4		1	2				8	4.03			8	3.523			8	5.337			8	3.328
Total	28	16			14	31			10	27		8	25			27	19		15	27				9	7.069	0.553968		9	7.385	0.738118		9	4.664	0.901158		9	9.868	0.350122
MUT	FOXD1	Six2		WT	FOXD1	Six2		MUT	FOXD1	Six2	WT	FOXD1	Six2		MUT	FOXD1	Six2	WT	FOXD1	Six2				10	3.916			10	5.451			10	4.203			10	3.455			0.0109857
A1_2	2	4			0	5		B1_2	2	3		0	2		C1_2	1	2		4	1				11	8.728	0.666361		11	12.779	0.387433		11	7.772	0.348173		11	5.48	0.857117
	2	5			1	5			5	2		3	1			3	1		0	5				12	5.816			12	4.951			12	2.706			12	4.697
	3	4			2	4			0	4		1	3			4	3		0	4				13	7.945	0.504594		13	7.828	0.535003		13	8.232	0.44898		13	7.487	0.433017
									0	4		2	2			3	1		1	3				14	4.009			14	4.188			14	3.696			14	3.242
	1	4			0	6			2	2		0	4			0	2		1	2				15	9.135	0.460099		15	11.548	0.475667		15	3.966	0.936703		15	9.012	0.430315
	3	2			1	3			1	3		1	3			1	4		0	3				16	4.203			16	5.493			16	4.234			16	3.878
	3	3			0	3			2	2		1	1			4	1		2	3				17	10.211	0.391049		17	7.635	0.590046		17	3.529	0.593408		17	6.282	0.627826
	2	3			1	5			2	5		0	4			3	1		2	4				18	3.993			18	4.505			18	5.947			18	3.944
	2	3			2	2			3	1		2	4			1	1		1	2				19	9.217	0.662363		19	6.095	0.546842		19	3.759	0.576711		19	4.921	0.933753
	5	1			1	4			5	1		3	1			1	2		1	3				20	6.105			20	3.333			20	6.518			20	4.595
	3	2			0	6			22	27		13	25			21	18		12	30				Total		5.86232				5.04892				6.64922				4.92523
Total	28	31			8	43		MUT	FOXD1	Six2	WT	FOXD1	Six2		MUT	FOXD1	Six2	WT	FOXD1	Six2												B1_3
MUT	FOXD1	Six2		WT	FOXD1	Six2		B1_3	2	1		1	4		C1_3	3	0							A1_3								1	9.965	0.374912		1	10.069	0.345516
A1_3	3	1			3	1			3	1		2	2			2	2		2	2				1	5.741	0.802822		1	6.623	0.478333		2	3.736			2	3.479
	3	2			1	2			2	2		1	3			2	3		3	1				2	4.609			2	3.168			3	6.619	0.521982		3	10.795	0.432052
	3	1			1	4			3	0		1	3			2	1		0	3				3	6.052	0.738764		3	9.595	0.42001		4	3.455			4	4.664
	3	2			5	1			2	1		1	2			2	2		2	3				4	4.471			4	4.03			5	4.982	0.878964		5	9.105	0.403954
	5	1			3	0			3	0		0	3			3	0		1	3				5	7.521	0.766786		5	5.202	0.713764		6	4.379			6	3.678
	1	3			2	2			5	0		1	2			4	0		0	4				6	5.767			6	3.713			7	7.475	0.833445		7	10.019	0.398543
	2	2			2	3			2	3		1	3			1	3		2	3				7	3.987	0.955657		7	7.057	0.802749		8	6.23			8	3.993
	4	2			0	4			3	2		2	3			1	3		1	5				8	4.172			8	5.665			9	6.928	0.763857		9	7.521	0.482782
	2	1			3	0			1	4		0	3			1	2		1	2				9	6.411	0.700359		9	5.827	0.587438		10	5.292			10	3.631
	2	4			0	5			26	14		10	28			21	16		12	26				10	4.49			10	3.423			11	4.774	0.956431		11	7.289	0.523529
Total	28	19			20	22		MUT	FOXD1	Six2	WT	FOXD1	Six2		MUT	FOXD1	Six2	WT	FOXD1	Six2				11	4.828	0.865162		11	4.151	0.970086		12	4.566			12	3.816
MUT	FOXD1	Six2		WT	FOXD1	Six2		B1_4	3	0		2	3		C1_4	1	3		1	2				12	4.177			12	4.279			13	7.68	0.664714		13	12.442	0.306221
A1_4	1	3			0	3			2	3		3	4			2	1		3	2				13	6.313	0.781562		13	13.183	0.314875		14	5.105			14	3.81
	1	3			1	3			3	1		2	3			1	1		0	3				14	4.934			14	4.151			15	3.12	0.500803		15	5.05	0.966322
	4	0			2	2			3	1		0	3			2	1		0	5				15	8.72	0.476032		15	13.587	0.250534		16	6.23			16	5.226
	4	2			0	4			1	3		2	2			4	0		0	3				16	4.151			16	3.404			17	3.966	1		17	9.154	0.476731
	3	3			0	6			3	2		2	1			5	1		0	3				17	6.974	0.758818		17	9.012	0.402241		18	3.966			18	4.364
	2	1			3	1			1	1		0	2			2	1		0	2				18	5.292			18	3.625			19	5.206	0.862778		19	9.097	0.516324
	3	2			1	2			2	2		1	5			1	3		0	5				19	6.105	0.700901		19	10.715	0.263462		20	6.034			20	4.697
	2	2			1	3			3	3		1	3			2	2		0	3				20	4.279			20	2.823					7.35788				4.85197
	4	2			1	3			3	1		2	2			2	3		2	3				Total		7.54686		Total		5.20349
Total	24	18			9	27			24	17		15	28			22	16		6	31				A1_4								B1_4
MUT	FOXD1	Six2		WT	FOXD1	Six2		MUT	FOXD1	Six2	WT	FOXD1	Six2		MUT	FOXD1	Six2	WT	FOXD1	Six2				1	7.89	0.611914		1	10.221	0.613932		1	8.264	0.556026		1	5.397	0.896065
A1_5	3	2			1	3		B1_5	3	1		3	1		C1_5	3	1		2	1				2	4.828			2	6.275			2	4.595			2	6.023
	2	3			1	5			3	1		3	3			3	1		0	3				3	8.573	0.489677		3	8.266	0.417977		3	7.833	0.41389		3	8.47	0.574144
	2	2			2	2			2	2		0	2			0	3		0	3				4	4.198			4	3.455			4	3.242			4	4.863
	1	2			3	0			3	2		0	3			2	2		0	3				5	6.645	0.672837		5	6.394	0.54035		5	7.22	0.656787		5	4.99	0.824521
	1	2			4	3			3	3		1	5			3	1		1	3				6	4.471			6	3.455			6	4.742			6	6.052
	3	1			0	3			1	0		2	2			1	2		0	3				7	6.671	0.90721		7	4.198	0.863506		7	14.537	0.274266		7	6.645	0.312415
	3	1			0	4			2	2		3	0			2	1		1	3				8	6.052			8	3.625			8	3.987			8	2.076
	3	1			0	3			0	2		0	4			0	2		4	1				9	7.268	0.801734		9	11.603	0.351461		9	7.024	0.687358		9	12.55	0.15251
	2	1			0	4			0	2		2	3			0	2		2	2				10	5.827			10	4.078			10	4.828			10	1.914
	2	2			2	2			3	1		1	5			0	3		0	4				11	8.673	0.406895		11	5.389	0.958897		11	5.711	0.873752		11	7.498	0.437717
Total	22	17			13	29			20	16		15	28			14	18		10	26				12	3.529			12	5.62			12	4.99			12	3.282
MUT	FOXD1	Six2		WT	FOXD1	Six2		MUT	FOXD1	Six2	WT	FOXD1	Six2		MUT	FOXD1	Six2	WT	FOXD1	Six2				13	4.641	0.640379		13	6.853	0.677222		13	7.484	0.721673		13	6.671	0.435617
A2_1	2	1			1	1		B2_1	3	2		1	4		C2_1	2	3							14	2.972			14	4.641			14	5.401			14	2.906
	3	2			1	4			1	1		1	2			2	1							15	8.875	0.550535		15	9.329	0.570265		15	5.02	0.890229		15	13.391	0.284968
	3	1			0	4			5	0		0	2			3	1							16	4.886			16	5.32			16	5.639			16	3.816
	1	3			0	2			1	3		2	1			3	1							17	4.779	1		17	8.095	0.92341		17	11.155	0.302913		17	8.378	0.630699
	4	2			0	2			1	5		3	3			4	2							18	4.779			18	7.475			18	3.379			18	5.284
	3	1			0	4			3	2		1	3			4	1							19	7.277	0.74385		19	7.501	0.490335		19	5.02	0.732847		19	7.475	0.555318
	4	1			1	4			1	2		2	2			2	1							20	5.413			20	3.678			20	6.85			20	4.151
	2	2			0	2			0	5		2	2			1	2							Total		6.82503				6.40735				6.10974				5.10397
	3	1			0	4			2	3		0	4			4	2
	3	0			0	3			2	3		1	2			1	3							A1_5								B1_5
Total	28	14			3	30			19	26		13	25			26	17							1	8.573	0.735215		1	7.06	0.620255		1	6.809	0.453224		1	5.48	0.642883
MUT	FOXD1	Six2		WT	FOXD1	Six2		MUT	FOXD1	Six2	WT	FOXD1	Six2											2	6.303			2	4.379			2	3.086			2	3.523
A2_2	3	1			3	2		B2_2	3	1		1	6											3	8.993	0.627822		3	5.871	0.629535		3	12.148	0.36327		3	8.638	0.526974
	5	1			2	3			4	0		0	5											4	5.646			4	3.696			4	4.413			4	4.552
	3	2			0	4			4	2		1	3											5	6.809	0.634308		5	9.887	0.407606		5	9.119	0.612458		5	4.552	0.967276
	3	1			0	2			4	2		0	3											6	4.319			6	4.03			6	5.585			6	4.706
	0	3			2	3			0	2		1	3											7	8.826	0.533197		7	6.758	0.614235		7	9.469	0.639138		7	6.751	0.653681
	3	4			0	5			2	2		0	2											8	4.706			8	4.151			8	6.052			8	4.413
	2	1			2	3			2	2		0	3											9	6.062	0.675355		9	6.034	0.839741		9	7.339	0.596675		9	10.312	0.201319
	2	2			2	3			2	2		0	2											10	4.094			10	5.067			10	4.379			10	2.076
	1	4			0	3			4	1		1	4											11	5.944	0.872981		11	6.171	0.799546		11	10.179	0.387464		11	7.705	0.485659
	2	1			2	1			2	3		1	4											12	5.189			12	4.934			12	3.944			12	3.742
Total	24	20			13	29			27	17		5	35											13	11.239	0.351366		13	4.733	0.732889		13	7.947	0.549138		13	7.06	0.353966
A2_3								MUT	FOXD1	Six2	WT	FOXD1	Six2											14	3.949			14	6.458			14	4.364			14	2.499
MUT	FOXD1	Six2		WT	FOXD1	Six2		B2_3	0	2		1	3											15	9.667	0.522913		15	11.742	0.274996		15	5.413	0.898722		15	7.362	0.508286
	3	0			1	2			1	3		1	4											16	5.055			16	3.229			16	6.023			16	3.742
	0	4			0	4			1	2		1	2											17	7.78	0.654113		17	9.791	0.320805		17	6.227	0.967226		17	9.656	0.214996
	1	2			0	4			3	1		2	3											18	5.089			18	3.141			18	6.438			18	2.076
	3	1			0	4			4	1		0	3											19	7.25	0.744414		19	11.112	0.284557		19	5.32	0.880212		19	8.48	0.373585
	3	1			1	3			0	3		4	2											20	5.397			20	3.162			20	6.044			20	3.168
	2	2			1	4			2	2		0	5											Total		6.35168		Total		5.52417				6.34753				4.92862
	0	2			3	4			4	2		2	3
	3	2			1	5			2	2		2	3											A4_1								B4_1
	2	2			2	2			3	2		2	3											1	9.98	0.544389		1	8.947	0.441377		1	6.244	0.694106		1	9.171	0.453277
	1	2			1	4			20	20		15	31											2	5.433			2	3.949			2	4.334			2	4.157
Total	18	18			10	36		MUT	FOXD1	Six2	WT	FOXD1	Six2											3	5.782	0.647181		3	6.736	0.650089		3	5.608	0.759451		3	8.757	0.437022
A2_4								B3_3																4	3.742			4	4.379			4	4.259			4	3.827
MUT	FOXD1	Six2		WT	FOXD1	Six2																		5	8.336	0.300864		5	6.761	0.467682		5	7.262	0.505646		5	5.937	0.998318
	1	3			1	3																		6	2.508			6	3.162			6	3.672			6	5.947
	3	1			1	3																		7	11.071	0.525336		7	6.034	0.612529		7	6.023	0.655653		7	5.57	0.606643
	2	1			0	3																		8	5.816			8	3.696			8	3.949			8	3.379
	1	2			1	3																		9	9.423	0.717181		9	7.621	0.974054		9	4.999	0.547236		9	9.414	0.708625
	3	2			3	2																		10	6.758			10	7.824			10	9.135			10	6.671
	1	3			0	3																		11	6.076	0.961982		11	4.595	0.916069		11	8.266	0.59896		11	6.694	0.561548
	1	1			2	4																		12	5.845			12	5.016			12	4.951			12	3.759
	2	1			2	5																		13	9.466	0.707796		13	7.898	0.763991		13	4.398	0.666667		13	10.584	0.451531
	1	2			3	1																		14	6.7			14	6.034			14	6.597			14	4.779
	3	1			1	3																		15	11.03	0.579692		15	8.095	0.835207		15	7.265	0.794357		15	10.305	0.397283
Total	18	17			14	30																		16	6.394			16	6.761			16	5.771			16	4.094
A2_5																								17	5.944	0.474933		17	9.067	0.579133		17	4.921	0.668432		17	8.831	0.508436
MUT	FOXD1	Six2		WT	FOXD1	Six2																		18	2.823			18	5.251			18	7.362			18	4.49
	2	3			3	1																		19	5.135	0.618306		19	8.601	0.507383		19	9.797	0.285087		19	9.616	0.50572
	4	2			1	5																		20	3.175			20	4.364			20	2.793			20	4.863
	4	2			0	3																		Total		6.07766				6.74751				6.17559				5.6284
	1	3			3	0
	1	2			2	2																		A4_2								B4_2
	4	1			1	3																		1	6.244	0.705157		1	8.913	0.68013		1	7.291	0.826087		1	11.095	0.476972
	1	2			1	4																		2	4.403			2	6.062			2	6.023			2	5.292
	2	3			1	5																		3	5.947	0.872541		3	5.055	0.846489		3	11.833	0.368799		3	9.598	0.485935
	0	4			1	4																		4	5.189			4	4.279			4	4.364			4	4.664
	1	2			0	5																		5	8.601	0.25997		5	9.441	0.462239		5	7.268	0.353192		5	7.148	0.545607
Total	20	24			13	32																		6	2.236			6	4.364			6	2.567			6	3.9
A3_1																								7	7.612	0.491592		7	6.337	0.62143		7	3.328	0.639262		7	6.977	0.846639
MUT	FOXD1	Six2		WT	FOXD1	Six2																		8	3.742			8	3.938			8	5.206			8	5.907
	3	3			1	3																		9	4.683	0.972788		9	8.581	0.681622		9	7.391	0.662833		9	11.378	0.430568
	2	3			2	3																		10	4.814			10	5.849			10	4.899			10	4.899
	3	1			0	4																		11	8.018	0.370666		11	7.484	0.547034		11	5.025	0.965232		11	8.916	0.474877
	4	0			0	3																		12	2.972			12	4.094			12	5.206			12	4.234
	2	3			1	2																		13	4.364	0.750344		13	11.714	0.276763		13	7.638	0.467531		13	8.533	0.431032
	4	1			3	2																		14	5.816			14	3.242			14	3.571			14	3.678
	4	1			0	3																		15	3.736	0.898725		15	5.577	0.711135		15	7.556	0.466252		15	10.179	0.372139
	1	4			0	4																		16	4.157			16	3.966			16	3.523			16	3.788
	3	0			1	4																		17	5.608	0.370185		17	12.262	0.292204		17	7.336	0.457061		17	5.413	0.920377
	2	2			2	3																		18	2.076			18	3.583			18	3.353			18	4.982
Total	28	18			10	31																		19	8.098	0.462089		19	8.811	0.416752		19	7.371	0.676435		19	6.227	0.755741
MUT	FOXD1	Six2		WT	FOXD1	Six2																		20	3.742			20	3.672			20	4.986			20	4.706
A3_2	2	3			1	3																		Total		6.15406				5.5358				5.88268				5.73989
	3	1			2	3
	3	1			0	4																		A4_3								B4_3
	4	0			3	1																		1	4.437	0.96439		1	13.09	0.234148		1	6.977	0.668482		1	11.795	0.351929
	1	3			3	1																		2	4.279			2	3.065			2	4.664			2	4.151
	1	3			0	4																		3	5.741	0.592928		3	7.069	0.587212		3	6.052	0.694481		3	10.578	0.591605
	3	2			1	3																		4	3.404			4	4.151			4	4.203			4	6.258
	3	1			0	1																		5	4.379	0.76433		5	3.242	0.709254		5	4.089	0.648739		5	6.044	0.969557
	1	3			0	3																		6	3.347			6	4.571			6	6.303			6	5.86
	1	2			0	3																		7	8.074	0.764305		7	8.232	0.539602		7	6.129	0.911894		7	9.05	0.28
Total	22	19			10	26																		8	6.171			8	4.442			8	5.589			8	2.534
MUT	FOXD1	Six2		WT	FOXD1	Six2																		9	5.292	0.729592		9	4.706	0.800612		9	7.75	0.364258		9	5.251	0.949533
A3_3	2	4			3	1																		10	3.861			10	5.878			10	2.823			10	4.986
	0	4			1	2																		11	8.19	0.659463		11	5.397	0.888249		11	7.912	0.556496		11	8.797	0.422076
	1	4			1	4																		12	5.401			12	6.076			12	4.403			12	3.713
	4	0			1	4																		13	12.046	0.229869		13	10.769	0.448324		13	7.683	0.516205		13	12.636	0.305556
	2	1			2	1																		14	2.769			14	4.828			14	3.966			14	3.861
	1	3			1	4																		15	8.18	0.507457		15	12.896	0.28156		15	9.948	0.521612		15	7.498	0.294212
	4	1			0	4																		16	4.151			16	3.631			16	5.189			16	2.206
	0	3			1	3																		17	7.142	0.540605		17	9.691	0.302858		17	5.292	0.874422		17	10.424	0.321086
	3	1			0	4																		18	3.861			18	2.935			18	6.052			18	3.347
	3	3			0	4																		19	12.012	0.378954		19	5.782	0.794708		19	10.378	0.349297		19	10.069	0.536399
Total	20	24			10	31																		20	4.552			20	4.595			20	3.625			20	5.401
MUT	FOXD1	Six2		WT	FOXD1	Six2																		Total		6.13189				5.58653				6.10589				5.02195
A3_4	5	4			1	2
	3	1			2	3																		A4_4								B4_4
	4	0			3	3																		1	8.076	0.565998		1	11.034	0.422693		1	8.211	0.565217		1	7.024	0.752278
	2	2			0	4																		2	4.571			2	4.664			2	4.641			2	5.284
	1	2			0	4																		3	5.127	0.866394		3	9.584	0.378235		3	8.947	0.328043		3	9.135	0.590805
	3	3			2	3																		4	4.442			4	3.625			4	2.935			4	5.397
	4	1			0	5																		5	4.437	0.647737		5	5.816	0.823934		5	5.741	0.851071		5	11.251	0.314194
	6	0			4	1																		6	6.85			6	4.792			6	4.886			6	3.535
	2	3			0	2																		7	7.89	0.578707		7	8.119	0.496367		7	4.398	0.655753		7	9.476	0.323449
	4	3			1	3																		8	4.566			8	4.03			8	2.884			8	3.065
Total	34	19			13	30																		9	6.052	0.824521		9	13.468	0.206786		9	6.847	0.681174		9	7.89	0.770089
MUT	FOXD1	Six2		WT	FOXD1	Six2																		10	4.99			10	2.785			10	4.664			10	6.076
A3_5	3	1			4	1																		11	5.878	0.976574		11	10.069	0.335584		11	10.253	0.614747		11	7.1	0.39
	4	1			0	4																		12	6.019			12	3.379			12	6.303			12	2.769
	4	1			1	3																		13	7.705	0.90318		13	9.507	0.293784		13	9.135	0.574822		13	8.728	0.489688
	3	2			1	3																		14	6.959			14	2.793			14	5.251			14	4.274
	2	2			2	2																		15	8.533	0.486464		15	6.655	0.593388		15	8.513	0.878069		15	8.119	0.341052
	4	1			3	1																		16	4.151			16	3.949			16	7.475			16	2.769
	2	1			1	1																		17	6.394	0.669221		17	5.255	0.724828		17	9.266	0.481006		17	10.604	0.416164
	2	2			0	4																		18	4.279			18	7.25			18	4.457			18	4.413
	3	1			1	3																		19	4.279	0.547677		19	10.572	0.321983		19	8.367	0.452731		19	13.924	0.344154
	2	2			0	4																		20	7.813			20	3.404			20	3.788			20	4.792
Total	29	14			13	26																		Total		7.06647				4.59758				6.08263				4.73187
MUT	FOXD1	Six2		WT	FOXD1	Six2
A4_1	2	2																						A4_5								B4_5
	0	4																						1	5.756	0.765019		1	13.11	0.24119		1	8.106	0.717493		1	8.467	0.399079
	1	1																						2	7.524			2	3.162			2	5.816			2	3.379
	2	3																						3	10.017	0.426675		3	7.78	0.629692		3	6.912	0.48886		3	7.498	0.415177
	2	2																						4	4.274			4	4.899			4	3.379			4	3.113
	1	2																						5	11.102	0.368312		5	5.878	0.929034		5	8.551	0.512104		5	13.493	0.295931
	2	2																						6	4.089			6	6.327			6	4.379			6	3.993
	2	2																						7	8.396	0.472368		7	5.875	0.438826		7	6.597	0.717447		7	7.157	0.560151
	2	3																						8	3.966			8	13.388			8	4.733			8	4.009
	4	0																						9	4.863	0.928231		9	4.899	0.57624		9	7.085	0.527311		9	10.137	0.54523
Total	18	21																						10	5.239			10	2.823			10	3.736			10	5.527
MUT	FOXD1	Six2		WT	FOXD1	Six2																		11	6.645	0.643943		11	12.05	0.244813		11	9.189	0.485036		11	10.795	0.277351
A4_2	5	0			1	1																		12	4.279			12	2.95			12	4.457			12	2.994
	4	0			1	2																		13	5.665	0.786761		13	13.376	0.159764		13	8.75	0.720343		13	9.541	0.253747
	4	1			2	3																		14	4.457			14	2.137			14	6.303			14	2.421
	1	3			0	3																		15	12.564	0.256447		15	10.088	0.334952		15	8.633	0.495656		15	8.757	0.474021
	1	3			0	3																		16	3.222			16	3.379			16	4.279			16	4.151
	0	3			2	2																		17	9.525	0.635381		17	8.406	0.527837		17	9.55	0.415288		17	8.928	0.562836
	1	2			0	3																		18	6.052			18	4.437			18	3.966			18	5.025
	2	4			2	1																		19	6.192	0.604328		19	8.947	0.394434		19	11.327	0.353933		19	5.193	1
	1	2			3	1																		20	3.742			20	3.529			20	4.009			20	5.193
	1	0			0	3																				5.88746				4.47678		Total		5.43347				4.78352
Total	19	18			11	22
MUT	FOXD1	Six2		WT	FOXD1	Six2																		A7_1
A4_3	1	2			1	3																		1	7.265	0.525258		1	9.922	0.389135
	2	1			1	3																		2	3.816			2	3.861
	3	1			0	3																		3	6.694	0.662832		3	10.128	0.229167
	3	0			0	3																		4	4.437			4	2.321
	1	2			0	4																		5	7.947	0.554046		5	6.354	0.301228
	1	2			1	2																		6	4.403			6	1.914
	1	2			0	2																		7	4.664	0.661664		7	5.433	0.514081
	1	2			3	1																		8	3.086			8	2.793
	3	1			3	0																		9	5.206	0.608529		9	7.024	0.467255
	3	0			1	2																		10	3.168			10	3.282
Total	19	13			10	23																		11	6.878	0.755016		11	10.221	0.454065
MUT	FOXD1	Six2		WT	FOXD1	Six2																		12	5.193			12	4.641
A4_4	3	1			0	4																		13	7.06	0.710482		13	8.518	0.380606
	4	1			3	3																		14	5.016			14	3.242
	3	1			1	2																		15	5.7	0.945439		15	9.841	0.240524
	1	4			1	3																		16	5.389			16	2.367
	1	1			0	3																		17	6.282	0.971694		17	8.47	0.295041
	2	2			4	0																		18	6.465			18	2.499
	3	2			3	0																		19	4.364	0.620073		19	6.514	0.442739
	1	3			0	3																		20	2.706			20	2.884
	2	3			0	3																		Total		7.01503				3.71384
	2	2			0	5
Total	22	20			12	26																		A7_2
MUT	FOXD1	Six2		WT	FOXD1	Six2																		1	8.964	0.667894		1	13.193	0.25415
A4_5	1	2			3	1																		2	5.987			2	3.353
	1	2			2	1																		3	4.982	0.99243		3	13.532	0.251552
	4	2			0	3																		4	5.02			4	3.404
	3	1			0	3																		5	4.863	0.606621		5	9.557	0.586376
	2	5			2	4																		6	2.95			6	5.604
	2	1			0	4																		7	8.156	0.432688		7	13.064	0.392453
	1	1			1	2																		8	3.529			8	5.127
	2	1			1	1																		9	5.02	0.99243		9	5.413	0.618326
	2	4			0	2																		10	4.982			10	3.347
	3	3			2	2																		11	9.584	0.358514		11	5.448	0.922764
Total	21	22			11	23																		12	3.436			12	5.904
																								13	9.366	0.585522		13	9.568	0.417329
																								14	5.484			14	3.993
FINAL	470	382	1.23037		217	547	0.396709		146	164	0.890244	94	225	0.417778		131	104	1.25962	55	140	0.392857			15	7.705	0.631149		15	12.476	0.399968
							Wildtype	Mutant																16	4.863			16	4.99
							0.3967	1.2303		0.4024	1.1267													17	9.213	0.745903		17	11.017	0.346374
							0.4177	0.8902	p-value	0.00366151														18	6.872			18	3.816
	Foxd1 Tip					0.0133929	0.3928	1.2596	0.205338															19	6.171	0.556798		19	10.077	0.61824
A	1	WT	tips	MUT	tips	B	1	WT		MUT		C	1	WT	tips	MUT	tips							20	3.436			20	6.23
		2	2	5	2																					6.56995				4.80753
		2	2	4	1
		0	2	4	2																			a7_3
		2	3	10	2																			1	6.787	0.744806		1	9.846	0.35842
		0	2	3	1																			2	5.055			2	3.529
	2	WT	tips	MUT	tips		2	WT	tips	MUT	tips		2	WT	tips	MUT	tips							3	7.556	0.898227		3	11.251	0.248245
		1																						4	6.787			4	2.793
		1																						5	6.645	0.575922		5	9.913	0.503379
		0																						6	3.827			6	4.99
		0																						7	5.527	0.615886		7	10.122	0.318317
		1																						8	3.404			8	3.222
	3	WT	tips	MUT	tips		3	WT	tips	MUT	tips		3	WT	tips	MUT	tips							9	7.371	0.748202		9	9.758	0.44876
																								10	5.515			10	4.379
																								11	5.711	0.724216		11	10.777	0.336364
																								12	4.136			12	3.625
																								13	7.657	0.673371		13	8.51	0.567333
																								14	5.156			14	4.828
	4	WT	tips	MUT	tips		4	WT	tips	MUT	tips		4	WT	tips	MUT	tips							15	12.871	0.290731		15	6.758	0.62119
																								16	3.742			16	4.198
																								17	6.799	0.562877		17	7.8	0.369744
																								18	3.827			18	2.884
																								19	8.779	0.426244		19	9.835	0.448704
																								20	3.742			20	4.413
	5	WT	tips	MUT	tips		5	WT	tips	MUT	tips		5	WT	tips	MUT	tips									6.26048				4.22045
																								A7_4
																								1	8.303	0.427918		1	9.616	0.407238
																								2	3.553			2	3.916
																								3	9.423	0.496975		3	11.642	0.325374
																								4	4.683			4	3.788
									Wildtype	Mutnat														5	6.809	0.776032		5	8.138	0.587245
									0.585366	2.19355		p-value	0.0139174											6	5.284			6	4.779
									0.263158	1.375														7	5.816	0.999312		7	6.787	0.319287
									0.333333	1.33333														8	5.812			8	2.167
									0.169442	0.485065														9	7.945	0.467338		9	13.136	0.221224
									0.393952	1.63396														10	3.713			10	2.906
																								11	8.913	0.568495		11	10.43	0.358773
mTmG	Attached										Detached													12	5.067			12	3.742
R3	MUT	ANGLE	LENGTH	SCORE		WT	ANGLE	LENGTH	SCORE		MUT	ANGLE	LENGTH	SCORE		WT	ANGLE	LENGTH	SCORE					13	3.949	0.739929		13	9.005	0.281399
	1		9.045	4.86129		1		7.541	6.59025		1		7.577	2.3567		1		8.671	7.62104					14	5.337			14	2.534
	2	48.371				2	78.653				2	117.993				2	169.102							15	5.976	0.799699		15	4.03	0.949628
	3		8.081	4.64783		3		5.308	5.07858		3		6.061	5.17973		3		7.501	6.58121					16	4.779			16	3.827
	4	51.764				4	86.11				4	166.914				4	168.964							17	6.655	0.575056		17	6.518	0.816201
	5		7.17	6.34091		5		13.509	12.3261		5		8.771	7.11396		5		9.138	6.79654					18	3.827			18	5.32
	6	79.593				6	82.119				6	162.997				6	156.939							19	7.813	0.760783		19	7.89	0.494297
	7		13.361	12.3033		7		8.703	5.66759		7		7.576	6.69382		7		7.067	6.7672					20	5.944			20	3.9
	8	82.875				8	58.61				8	169.52				8	176.182									6.61154				4.76067
	9		6.026	3.3441		9		8.992	8.15514		9		7.067	3.20755		9		12.765	8.13471
	10	49.945				10	81.624				10	130.849				10	147.354							A7_5
	11		9.708	9.32723		11		8.002	7.10062		11		7.411	0.763827		11		7.545	5.15952					1	10.255	0.287665		1	7.813	0.613337
	12	86.47				12	79.862				12	99.276				12	151.545							2	2.95			2	4.792
	13		6.354	6.23899		13		8.978	4.01596		13		8.248	1.49692		13		6.34	5.59399					3	9.283	0.317785		3	6.438	0.872942
	14	88.371				14	40.258				14	106.334				14	169.41							4	2.95			4	5.62
	15		9.948	9.56578		15		10.709	10.169		15		7.273	3.68483		15		6.502	4.3947					5	5.496	0.548667		5	6.192	0.494994
	16	86.542				16	85.462				16	135.598				16	150.831							6	10.017			6	3.065
	17		8.157	7.71281		17		11.553	6.29228		17		6.323	3.19965		17		12.523	7.60104					7	7.336	0.457061		7	7.75	0.409677
	18	85.099				18	49.018				18	135.543				18	144.627							8	3.353			8	3.175
	19		11.623	9.31403		19		11.715	11.636		19		6.405	2.29954		19		7.993	0.56475					9	4.089	0.794571		9	9.541	0.343989
	20	72.121				20	89.393				20	122.312				20	96.359							10	3.249			10	3.282
	TOTAL	731.151	89.473	73.6562			731.109	95.01	77.0315			1347.34	72.712	35.9965			1531.31	86.045	59.2147					11	5.608	0.814194		11	9.705	0.457702
	AVERAGE	73.1151	8.9473	7.36562			73.1109	9.501	7.70315			134.734	7.2712	3.59965			153.131	8.6045	5.92147					12	4.566			12	4.442
																								13	4.951	0.810975		13	6.394	0.967908
																								14	6.105			14	6.606
																								15	8.367	0.54464		15	10.422	0.253502
	R3	Attached					Unattached				R3	Attached					Unattached							16	4.557			16	2.642
	MUT			Roundness					Roundness		WT			Roundness					Roundness					17	8.809	0.416846		17	4.999	0.906437
	1		9.011	0.560093							1		8.136	0.389872										18	3.672			18	5.515
	2		5.047								2		3.172											19	7.484	0.5		19	9.487	0.374512
	3	32.911									3	71.847												20	3.742			20	3.553
	4							5.965	0.555574		4		7.317	0.515238												5.4924				5.695
	5							3.314			5		3.77
	6						108.446				6	31.122												A10_1
	7		9.528	0.519836							7							12.879	0.353987					1	7.06	0.505807		1	8.633	0.505502
	8		4.953								8							4.559						2	3.571			2	4.364
	9	55.409									9						163.884							3	6.977	0.643543		3	7.262	0.388736
	10		12.912	0.40141							10							12.504	0.288388					4	4.49			4	2.823
	11		5.183								11							3.606						5	11.422	0.35703		5	16.626	0.237219
	12	79.085									12						160.5							6	4.078			6	3.944
	13		9.618	0.697858							13							11.904	0.353243					7	7.265	0.578527		7	9.791	0.362271
	14		6.712								14							4.205						8	4.203			8	3.547
	15	89.137									15						161.201							9	7.945	0.480302		9	4.986	0.695786
	16							8.701	0.523963		16		10.037	0.402212										10	3.816			10	7.166
	17							4.559			17		4.037											11	7.291	0.459059		11	9.595	0.416154
	18						106.324				18	65.348												12	3.347			12	3.993
	19		9.983	0.629971							19		8.55	0.608772										13	7.277	0.370757		13	11.998	0.244624
	20		6.289								20		5.205											14	2.698			14	2.935
	21	86.506									21	73.599												15	4.982	0.709554		15	8.638	0.581732
	22							8.198	0.699073		22							6.838	0.427903					16	3.535			16	5.025
	23							5.731			23							2.926						17	8.74	0.308696		17	9.487	0.526932
	24						121.814				24						168.347							18	2.698			18	4.999
	25							9.005	0.632871		25		9.266	0.492014										19	6.632	0.677021		19	9.868	0.511755
	26							5.699			26		4.559											20	4.49			20	5.05
	27						151.943				27	39.538														5.0903				4.47071
	28		8.533	0.7212							28		10.357	0.464613
	29		6.154								29		4.812											A10_2
	30	87.689									30	86.152												1	4.846	0.933179		1	14.671	0.297458
	31		11.835	0.442248							31		10.797	0.407428										2	5.193			2	4.364
	32		5.234								32		4.399											3	5.767	0.772846		3	11.808	0.35857
	33	38.724									33	77.693												4	4.457			4	4.234
	34							7.335	0.699659		34		9.943	0.348688										5	5.665	0.768552		5	10.019	0.337259
	35							5.132			35		3.467											6	7.371			6	3.379
	36						146.824				36	9.939												7	6.751	0.869649		7	4.177	0.614355
	37							10.829	0.477145		37		10.098	0.40612										8	5.871			8	6.799
	38							5.167			38		4.101											9	5.46	0.864882		9	7.265	0.572195
	39						165.403				39	86.386												10	6.313			10	4.157
	40							7.305	0.547707		40		11.894	0.424332										11	8.52	0.368662		11	10.584	0.452759
	41							4.001			41		5.047											12	3.141			12	4.792
	42						165.998				42	60.379												13	6.514	0.63494		13	12.055	0.172211
	43		9.01	0.527525							43		9.498	0.445567										14	4.136			14	2.076
	44		4.753								44		4.232											15	7.956	0.487431		15	8.169	0.614518
	45	66.971									45	63.893												16	3.878			16	5.02
	46							7.823	0.602071		46							12.882	0.401956					17	6.777	0.974768		17	9.846	0.321755
	47							4.71			47							5.178						18	6.606			18	3.168
	48						134.689				48						167.944							19	5.496	0.848617		19	9.135	0.434154
	49							7.48	0.64746		49							14.878	0.199422					20	4.664			20	3.966
	50							4.843			50							2.967								7.52353				4.17524
	51						141.266				51						173.275
	52							9.272	0.53311		52		11.693	0.297956										A10_3
	53							4.943			53		3.484											1	5.767	0.842552		1	8.671	0.68089
	54						165.178				54	51.595												2	4.859			2	5.904
	55							8.206	0.413356		55		7.913	0.558195										3	9.577	0.330793		3	4.846	0.582542
	56							3.392			56		4.417											4	3.168			4	2.823
	57						101.154				57	79.469												5	5.016	0.945375		5	6.912	0.40408
	58		11.085	0.466035							58		13.007	0.470977										6	4.742			6	2.793
	59		5.166								59		6.126											7	6.694	0.92187		7	10.502	0.397734
	60	55.701									60	69.737												8	6.171			8	4.177
	61		11.823	0.468409							61							9.696	0.334777					9	5.944	0.95895		9	9.213	0.349723
	62		5.538								62							3.246						10	5.7			10	3.222
	63	37.883									63						177.163							11	7.452	0.618492		11	4.999	0.960238
	64		8.578	0.672418							64							8.122	0.369737					12	4.609			12	5.206
	65		5.768								65							3.003						13	6.684	0.52708		13	10.765	0.320948
	66	88.302									66						177.51							14	3.523			14	3.455
	67		10.296	0.586344							67							9.805	0.455992					15	6.023	0.568529		15	10.471	0.266737
	68		6.037								68							4.471						16	10.594			16	2.793
	69	56.634									69						168.056							17	5.845	0.843678		17	10.19	0.384298
	70							6.314	0.878524		70		12.206	0.364329										18	6.928			18	3.916
	71							5.547			71		4.447											19	6.642	0.624962		19	11.424	0.506828
	72						124.205				72	81.621												20	4.151			20	5.79
	73		5.465	0.659469							73		8.513	0.709151												7.18228				4.85402
	74		3.604								74		6.037
	75	78.808									75	15.441
	76		9.77	0.430399							76		8.219	0.351381
	77		4.205								77		2.888
	78	64.057									78	87.155													FINAL	116.153				91.8401				63.2624				50.6511
	79							7.693	0.493046		79		5.738	0.75671												0.580765				0.459201				0.632624				0.506511
	80							3.793			80		4.342
	81						102.74				81	69.567
	82							5.811	0.924626		82		10.06	0.422266
	83							5.373			83		4.248
	84						112.313				84	84.781
	85							7.864	0.608215		85		9.814	0.448237
	86							4.783			86		4.399														0.4592	0.5807
	87						127.905				87	52.151															0.5065	0.6326										0.453298	0.606695
	88							13.482	0.356475		88		10.797	0.393443
	89							4.806			89		4.248
	90						138.341				90	87.27
	91							8.59	0.781374		91		9.803	0.380496
	92							6.712			92		3.73
	93						95.593				93	79.088
	94		9.46	0.404228							94		7.897	0.75535
	95		3.824								95		5.965											R5	Attached					Unattached				R5	Attached					Unattached
	96	84.369									96	73.041												MUT			Roundness					Roundness		WT			Roundness					Roundness
	97							8.392	0.570067		97		6.766	0.606119										1		7.32	0.48265							1		10.04	0.348406
	98							4.784			98		4.101											2		3.533								2		3.498
	99						159.915				99	58.194												3	87.452									3	74.003
	100							8.698	0.50046		100		9.411	0.4567										4		10.335	0.324238							4		9.437	0.324573
	101							4.353			101		4.298											5		3.351								5		3.063
	102						103.093				102	46.045												6	62.572									6	31.972
	103							8.703	0.457428		103		9.781	0.726306										7							6.222	0.776117		7							6.323	0.593547
	104							3.981			104		7.104											8							4.829			8							3.753
	105						112.344				105	88.091												9						173.717				9						150.535
	106							7.323	0.801038		106							12.995	0.372682					10		7.78	0.505784							10		7.447	0.371022
	107							5.866			107							4.843						11		3.935								11		2.763
	108						101.558				108						151.022							12	16.963									12	31.419
	109		11.149	0.469818							109							8.8	0.390455					13		8.413	0.557708							13		8.674	0.471063
	110		5.238								110							3.436						14		4.692								14		4.086
	111	31.905									111						103.211							15	82.627									15	77.463
	112		9.539	0.436419							112		10.749	0.504977										16							6.234	0.677735		16		5.828	0.979925
	113		4.163								113		5.428											17							4.225			17		5.711
	114	60.777									114	69.98												18						114.689				18	85.943
		1094.87		9.09368			797.046		12.7032		115		9.796	0.82452										19		8.564	0.590028							19		9.049	0.624931
		64.404		0.534922			37.9546		0.604916		116		8.077											20		5.053								20		5.655
											117	77.774												21	81.884									21	26.357
							58.932		113.085		118							11.654	0.340227					22		6.046	0.672345							22		10.885	0.393018
											119							3.965						23		4.065								23		4.278
											120						135.259							24	73.791									24	87.824
											121		10.477	0.517133										25		6.626	0.673861							25		10.069	0.264872
											122		5.418											26		4.465								26		2.667
											123	56.287												27	59.491									27	87.209
											124							8.977	0.519661					28		5.777	0.721828							28		10.265	0.360546
											125							4.665						29		4.17								29		3.701
											126						176.51							30	13.384									30	71.481
											127		13.56	0.380531										31							7.835	0.507849		31		9.645	0.506998
											128		5.16											32							3.979			32		4.89
											129	83.19												33						174.093				33	25.72
											130		14.146	0.231019										34		10.477	0.392192							34		7.024	0.377847
											131		3.268											35		4.109								35		2.654
											132	65.831												36	69.724									36	87.128
											133		9.701	0.52376										37							6.447	0.602141		37							6.831	0.780998
											134		5.081											38							3.882			38							5.335
											135	59.481												39						124.026				39						95.12
												2101.69		15.5844			913.882		4.80843					40							5.532	0.560376		40		7.636	0.515322
												65.6777		0.487013			70.2986		0.369879					41							3.1			41		3.935
																								42						96.816				42	36.575
																								43		7.32	0.726639							43		8.332	0.408305
																								44		5.319								44		3.402
	L3	Attached					Unattached				L3	Attached					Unattached							45	12.016									45	85.365
	MUT			Roundness					Roundness		WT			Roundness					Roundness					46							8.746	0.556254		46		9.52	0.517437
	1							13.253	0.295103		1		9.307	0.459654										47							4.865			47		4.926
	2							3.911			2		4.278											48						100.336				48	80.308
	3						171.614				3	88.644												49		9.039	0.559686							49							8.724
	4							7.162	0.676208		4		8.138	0.580487										50		5.059								50							5.07
	5							4.843			5		4.724											51	36.955									51						132.397
	6						177.48				6	58.634												52							6.664	0.701531		52							9.654	0.299669
	7							8.564	0.784213		7													53							4.675			53							2.893
	8							6.716			8							6.558	0.534157					54						106.155				54						171.113
	9						147.524				9							3.503						55		7.335	0.622631							55							10.03	0.469591
	10		7.746	0.638136							10						96.871							56		4.567								56							4.71
	11		4.943								11							6.421	0.653481					57	59.662									57						176.349
	12	81.601									12							4.196						58		5.335	0.756888							58		6.965	0.690452
	13							6.721	0.738878		13						136.822							59		4.038								59		4.809
	14							4.966			14							7.637	0.721749					60	68.029									60	84.586
	15						171.308				15							5.512						61							5.976	0.701305		61		10.288	0.454219
	16		6.126	0.849657							16		7.57	0.479789			153.971							62							4.191			62		4.673
	17		5.205								17		3.632											63						158.154				63	72.758
	18	79.798									18	55.93												64		9.878	0.555173							64		11.385	0.374704
	19							9.307	0.556141		19							9.433	0.433054					65		5.484								65		4.266
	20							5.176			20							4.085						66	26.794									66	68.727
	21						118.921				21						161.238							67		12.693	0.311353							67		17.356	0.214681
	22							9.94	0.600101		22							9.176	0.52779					68		3.952								68		3.726
	23							5.965			23							4.843						69	57.514									69	80.901
	24						96.833				24						155.519							70							8.651	0.70697		70		8.706	0.576614
	25							7.527	0.578584		25							6.745	0.590215					71							6.116			71		5.02
	26							4.355			26							3.981						72						160.526				72	85.162
	27						160.261				27						110.661							73							8.509	0.459866		73		9.69	0.352838
	28							6.165	0.592701		28		9.15	0.473443										74							3.913			74		3.419
	29							3.654			29		4.332											75						130.568				75	24.665
	30						64.995				30	75.371												76		5.711	0.805113							76							8.537	0.48038
	31		8.255	0.357965							31							9.492	0.443742					77		4.598								77							4.101
	32		2.955								32							4.212						78	39.757									78						117.099
	33	74.585									33						154.67							79							6.646	0.592988		79		9.418	0.389467
	34		5.779	0.585395							34							8.345	0.460875					80							3.941			80		3.668
	35		3.383								35							3.846						81						158.774				81	35.994
	36	14.916									36						175.083							82		9.708	0.385455							82							10.531	0.324661
	37							5.543	0.651994		37							13.83	0.38308					83		3.742								83							3.419
	38							3.614			38							5.298						84	83.16									84						140.94
	39						108.17				39						172.549							85		10.818	0.581346							85							6.78	0.556047
	40							7.261	0.636551		40							8.929	0.497816					86		6.289								86							3.77
	41							4.622			41							4.445						87	35.07									87						167.594
	42						170.742				42						128.072							88		12.819	0.37538							88							8.423	0.742253
	43		6.497	0.614745							43		9.956	0.393933										89		4.812								89							6.252
	44		3.994								44		3.922											90	76.634									90						176.323
	45	70.56									45	87.01												91							7.364	0.656573		91		8.927	0.830178
	46							6.502	0.662412		46							8.724	0.409445					92							4.835			92		7.411
	47							4.307			47							3.572						93						176.703				93	84.646
	48						176.79				48						149.313							94							7.314	0.80886		94							8.02	0.42182
	49							7.364	0.722569		49							7.17	0.590237					95							5.916			95							3.383
	50							5.321			50							4.232						96						152.378				96						121.862
	51						93.985				51						107.935							97							6.012	0.760479		97							8.584	0.49301
	52							8.888	0.516427		52							8.188	0.44553					98							4.572			98							4.232
	53							4.59			53							3.648						99						172.893				99						126.362
	54						105.822				54						161.374							100							6.154	0.68297		100		12.488	0.378043
	55							9.263	0.808917		55							6.716	0.664086					101							4.203			101		4.721
	56							7.493			56							4.46						102						92.691				102	72.318
	57						117.597				57						112.538							103							8.706	0.641971		103		8.819	0.567071
	58		10.855	0.382128							58		10.2	0.608039										104							5.589			104		5.001
	59		4.148								59		6.202											105						148.666				105	66.801
	60	17.828									60	69.199												106							7.5	0.596133		106							10.284	0.396538
	61		4.953	0.721179							61							11.173	0.397834					107							4.471			107							4.078
	62		3.572								62							4.445						108						177.298				108						139.783
	63	71.772									63						164.694							109		8.321	0.490927							109							10.218	0.340967
	64		10.075	0.430769							64							8.332	0.524844					110		4.085								110							3.484
	65		4.34								65							4.373						111	41.723									111						178.104
	66	77.33									66						153.144							112							10	0.4406		112							7.092	0.579385
	67							8.632	0.641566		67							7.565	0.321613					113							4.406			113							4.109
	68							5.538			68							2.433						114						157.809				114						168.133
	69						174.43				69						125.471							115							7.051	0.421784		115		11.654	0.360992
	70							12.505	0.414074		70		9.52	0.505147										116							2.974			116		4.207
	71							5.178			71		4.809											117						92.04				117	84.07
	72						143.177				72	51.203												118		6.083	0.685517							118		13.092	0.299572
	73							8.219	0.569291		73							14.281	0.310202					119		4.17								119		3.922
	74							4.679			74							4.43						120	19.121									120	84.844
	75						91.983				75						177.46							121		10.48	0.343511							121		13.984	0.279677
	76							8.421	0.433915		76		8.632	0.411029										122		3.6								122		3.911
	77							3.654			77		3.548											123	13.381									123	84.859
	78						99.429				78	52.721												124		6.286	0.901527							124		6.907	0.714058
	79		7.706	0.583701							79							6.556	0.508237					125		5.667								125		4.932
	80		4.498								80							3.332						126	81.525									126	87.393
	81	88.288									81						112.286							127							8.092	0.415966		127		13.787	0.251469
	82		9.494	0.366969							82		7.144	0.432391										128							3.366			128		3.467
	83		3.484								83		3.089											129						94.604				129	87.246
	84	27.897									84	67.166												130							7.309	0.507457		130		11.584	0.359548
	85							10.357	0.441441		85							12.562	0.338163					131							3.709			131		4.165
	86							4.572			86							4.248						132						115.366				132	54.519
	87						140.6				87						149.702							133		9.773	0.357311							133		11.923	0.273757
	88							12.403	0.488995		88							11.845	0.444913					134		3.492								134		3.264
	89							6.065			89							5.27						135	74.277									135	82.689
	90						171.79				90						147.458							136		8.482	0.385286							136							9.197	0.434816
	91							12.255	0.441126		91		6.764	0.690863										137		3.268								137							3.999
	92							5.406			92		4.673											138	11.647									138						155.918
	93						153.94				93	54.596												139		12.964	0.262265								2130.95		13.8316			2217.63		6.91368
	94							9.004	0.563083		94		12.151	0.489425										140		3.4									68.7402		0.446181			57.8421		0.460912
	95							5.07			95		5.947											141	83.797
	96						116.565				96	65.358												142							5.934	0.715875
	97		11.717	0.403516							97		7.449	0.712579										143							4.248
	98		4.728								98		5.308											144						178.689
	99	73.189									99	80.779												145							6.831	0.648807
	100		8.672	0.464714							100		8.836	0.563377										146							4.432
	101		4.03								101		4.978											147						111.902
	102	39.031									102	87.657												148		8.522	0.450481
	103							5.532	0.752531		103		9.757	0.524239										149		3.839
	104							4.163			104		5.115											150	87.146
	105						171.644				105	47.568												151							6.368	0.641646
	106		13.031	0.276264							106		11.404	0.452473										152							4.086
	107		3.6								107		5.16											153						128.898
	108	22.908									108	51.404													1456.1		14.4771
	109		6.997	0.663427							109		11.69	0.370573											53.9295		0.53619			3297.79		14.7823
	110		4.642								110		4.332																	47.408		0.615927
	111	73.873									111	56.31
	112		11.625	0.51157							112		8.893	0.50849
	113		5.947								113		4.522											R7	Attached					Unattached				R7	Attached
	114	74.548									114	88.354												MUT			Roundness					Roundness		WT			Roundness
	115							11.295	0.394157		115							9.51	0.467403					1		9.734	0.42254							1		11.362	0.354691
	116							4.452			116							4.445						2		4.113								2		4.03
	117						90				117						136.038							3	81.712									3	65.023
	118		14.66	0.529604							118							10.257	0.406552					4		7.561	0.51726							4		11.168	0.324319
	119		7.764								119							4.17						5		3.911								5		3.622
	120	39.138									120						179.034							6	36.248									6	68.2
	121		9.083	0.572278							121		6.538	0.632762										7							7.018	0.774152		7							7.653	0.65948
	122		5.198								122		4.137											8							5.433			8							5.047
	123	43.305									123	32.025												9						148.822				9						130.716
	124		7.305	0.897741							124							12.143	0.46323					10		7.856	0.834394							10		8.367	0.622923
	125		6.558								125							5.625						11		6.555								11		5.212
	126	80.758									126						141.147							12	44.818									12	85.429
	127							8.77	0.517788		127		9.138	0.590939										13							7.092	0.687958		13							9.737	0.469036
	128							4.541			128		5.4											14							4.879			14							4.567
	129						162.133				129	59.906												15						109.093				15						140.745
	130							6.881	0.66095		130		13.044	0.73919										16		7.253	0.643182							16		15.475	0.284265
	131							4.548			131		9.642											17		4.665								17		4.399
	132						172.388				132	53.197												18	66.843									18	84.429
	133		14.886	0.404272							133													19							7.663	0.796424		19		8.479	0.60526
	134		6.018								134							8.327	0.542092					20							6.103			20		5.132
	135	89.026									135							4.514						21						112.271				21	84.82
	136							10.903	0.467761		136						172.105							22							6.489	0.767144		22		8.358	0.572266
	137							5.1			137							10.414	0.521221					23							4.978			23		4.783
	138						109.664				138							5.428						24						108.34				24	82.257
	139							6.616	0.780985		139		9.004	0.463127			164.803							25							10.845	0.471277		25		9.372	0.448677
	140							5.167			140		4.17											26							5.111			26		4.205
	141						128.472				141	70.321												27						118.475				27	60.117
	142		9.675	0.692713							142		9.611	0.555093										28		6.453	0.483031							28		11.918	0.389075
	143		6.702								143		5.335											29		3.117								29		4.637
	144	86.53									144	66.49												30	30.729									30	59.954
	145		7.411	0.566185							145		16.943	0.290799										31		9.603	0.717068							31		7.753	0.494389
	146		4.196								146		4.927											32		6.886								32		3.833
	147	54.171									147	83.412												33	86.464									33	76.19
	148							5.887	0.838967		148		5.287	0.750142										34							6.568	0.78989		34		7.51	0.35233
	149							4.939			149		3.966											35							5.188			35		2.646
	150						122.4				150	84.474												36						94.442				36	57.879
	151		6.968	0.56128							151													37							11.601	0.485044		37		10.491	0.547994
	152		3.911								152							5.534	0.77575					38							5.627			38		5.749
	153	64.44									153							4.293						39						152.323				39	84.617
	154		6.307	0.708578							154		15.221	0.276394			113.245							40							8.94	0.413982		40							11.918	0.405437
	155		4.469								155		4.207											41							3.701			41							4.832
	156	60.623									156	75.8												42						103.675				42						165.272
	157		8.631	0.691113							157													43		8.553	0.59067							43		6.661	0.638192
	158		5.965								158							11.573	0.447421					44		5.052								44		4.251
	159	52.519									159							5.178						45	57.858									45	59.376
	160							9.134	0.456536		160		12.494	0.471266			157.92							46							7.945	0.724733		46		8.916	0.605204
	161							4.17			161		5.888											47							5.758			47		5.396
	162						101.114				162	45.498												48						105.888				48	29.73
	163							8.613	0.370603		163							10.458	0.448174					49		8.173	0.395815							49							9.522	0.429112
	164							3.192			164							4.687						50		3.235								50							4.086
	165						139.216				165						156.283							51	34.197									51						151.359
	166							11.792	0.360244		166		12.467	0.451672										52							11.137	0.390859		52							7.353	0.457772
	167							4.248			167		5.631											53							4.353			53							3.366
	168						129.962				168	86.249												54						159.731				54						136.317
	169		8.59	0.727357							169							7.753	0.550239					55							7.137	0.667647		55		8.522	0.561371
	170		6.248								170							4.266						56							4.765			56		4.784
	171	75.168									171						113.79							57						178.581				57	88.803
	172		8.136	0.681785							172							9.503	0.366621					58							6.568	0.611297		58		7.92	0.583586
	173		5.547								173							3.484						59							4.015			59		4.622
	174	85.205									174						156.186							60						157.189				60	54.822
		1619.01		14.883			1420.95		18.4148		175		12.5	0.39872										61							5.966	0.675494		61		10.698	0.47392
		62.2695		0.572425			44.4047		0.575463		176		4.984											62							4.03			62		5.07
											177	74.354												63						169.103				63	87.51
											178		8.663	0.630382										64							7.411	0.601808		64							7.576	0.361668
											179		5.461											65							4.46			65							2.74
											180	11.744												66						108.382				66						171.095
											181		9.972	0.395207										67		9.542	0.440893							67							10.909	0.317628
											182		3.941											68		4.207								68							3.465
											183	65.283												69	81.936									69						167.271
											184							6.724	0.645449					70							7.258	0.630339		70		8.783	0.436184
											185							4.34						71							4.575			71		3.831
											186						176.668							72						105.99				72	88.155
											187		8.746	0.508232										73							6.952	0.616801		73		7.125	0.51593
											188		4.445											74							4.288			74		3.676
											189	46.351												75						95.684				75	49.635
											190							10.845	0.33905					76							8.387	0.963515		76		10.391	0.417862
											191							3.677						77							8.081			77		4.342
											192						157.961							78						162.583				78	74.618
											193		15.142	0.413288										79							9.726	0.559634		79							9.122	0.571804
											194		6.258											80							5.443			80							5.216
											195	73.344												81						157.689				81						147.783
												2066.35		16.2231			1862.01		16.1743					82							7.097	0.71185		82							7.904	0.550987
												64.5735		0.506973			56.4246		0.490129					83							5.052			83							4.355
																								84						161.203				84						169.79
	L5	Attached					Unattached				L5	Attached												85							5.198	0.730858		85							8.888	0.462309
	1		11.871	0.449499							1		7.506	0.547429										86							3.799			86							4.109
	2		5.336								2		4.109											87						159.187				87						179.758
	3	22.643									3	46.733												88							6.733	0.85831		88		11.446	0.415254
	4							7.712	0.563019		4		9.238	0.768456										89							5.779			89		4.753
	5							4.342			5		7.099											90						165.203				90	38.369
	6						130.593				6	62.484												91							10.757	0.605652		91		8.392	0.582936
	7							8.417	0.515623		7		7.245	0.432436										92							6.515			92		4.892
	8							4.34			8		3.133											93						174.992				93	53.809
	9						118.485				9	12.016												94		6.497	0.696014							94							7.355	0.760027
	10							5.743	0.705729		10		7.47	0.532396										95		4.522								95							5.59
	11							4.053			11		3.977											96	49.633									96						175.245
	12						119.038				12	17.35												97							7.697	0.691178		97		9.933	0.922581
	13		5.1	0.766863							13		7.713	0.467263										98							5.32			98		9.164
	14		3.911								14		3.604											99						154.59				99	56.625
	15	28.634									15	89.517												100							5.916	0.636072		100		10.586	0.46656
	16		5.798	0.988444							16		9.612	0.389305										101							3.763			101		4.939
	17		5.731								17		3.742											102						101.004				102	85.092
	18	77.519									18	88.593												103							9.77	0.524258		103		8.862	0.425638
	19							8.584	0.40028		19		7.842	0.444529										104							5.122			104		3.772
	20							3.436			20		3.486											105						119.212				105	81.183
	21						114.228				21	89.079												106		10.449	0.72227							106		13.136	0.323386
	22		7.21	0.441193							22		9.52	0.429202										107		7.547								107		4.248
	23		3.181								23		4.086											108	17.322									108	73.809
	24	73.836									24	85.624												109							7.132	0.845906			1730.45		12.3648			1735.35		5.44526
	25		7.572	0.751717							25		10.638	0.560726										110							6.033				69.218		0.494592			67.7592		0.495024
	26		5.692								26		5.965											111						175.928
	27	62.221									27	88.076												112							9.627	0.447388
	28		8.965	0.611154							28							11.183	0.331843					113							4.307
	29		5.479								29							3.711						114						93.691
	30	46.87									30						125.357							115							7.496	0.876868
	31							6.815	0.617021		31		12.243	0.27142										116							6.573
	32							4.205			32		3.323											117						118.673
	33						116.097				33	74.056												118		7.024	0.721811
	34		6.824	0.78136							34		9.398	0.485954										119		5.07
	35		5.332								35		4.567											120	79.252
	36	47.928									36	86.101												121							9.189	0.534117
	37							6.396	0.621013		37		6.737	0.796942										122							4.908
	38							3.972			38		5.369											123						149.692
	39						105.344				39	83.506												124							8.106	0.764002
	40							7.355	0.451801		40		9.457	0.521518										125							6.193
	41							3.323			41		4.932											126						168.555
	42						100.619				42	59.346												127		10	0.4417
	43							6.026	0.678062		43							6.294	0.550842					128		4.417
	44							4.086			44							3.467						129	75.61
	45						135.696				45						95.568							130							7.545	0.649967
	46		7.541	0.796579							46							8.335	0.483503					131							4.904
	47		6.007								47							4.03						132						146.037
	48	25.023									48						163.74								742.622		7.62665			4236.23		20.5044
	49							9.411	0.526299		49							9.31	0.54275						57.1248		0.586665			46.6525		0.661433
	50							4.953			50							5.053
	51						172.313				51						168.047
	52							6.127	0.693325		52		10.222	0.43876
	53							4.248			53		4.485
	54						129.436				54	80.153
	55							5.132	0.831255		55							6.528	0.671722
	56							4.266			56							4.385
	57						98.085				57						178.701
	58							7.146	0.871956		58							9.09	0.485919
	59							6.231			59							4.417
	60						109.964				60						149.631
	61		10.644	0.491732							61							8.725	0.363782
	62		5.234								62							3.174									L1	1						7.371	0.555963			L1	1		9.678	0.680616							R1
	63	58.861									63						142.047											2						4.098					2		6.587
	64		8.746	0.774754							64		9.773	0.582421														3					140.653						3	89.694
	65		6.776								65		5.692															4						8.399	0.6396				4		9.44	0.489089
	66	89.56									66	71.264																5						5.372					5		4.617
	67							7.233	0.636665		67		9.639	0.488744														6					156.792						6	78.005
	68							4.605			68		4.711															7						9.037	0.39969				7							9.444	0.431914
	69						139.297				69	67.451																8						3.612					8							4.079
	70							8.392	0.525262		70		7.937	0.439965														9					133.434						9						171.904
	71							4.408			71		3.492															10						10.964	0.495804			L2	1		12.298	0.362254							R2
	72						106.271				72	67.55																11						5.436					2		4.455
	73							6.732	0.64691		73							8.584	0.367311									12					145.814						3	67.637
	74							4.355			74							3.153										13		13.312	0.34991							L3	1		11.019	0.419094
	75						90.095				75						156.478											14		4.658									2		4.618
	76		7.57	0.460238							76		8.614	0.479916														15	74.825										3	80.482
	77		3.484								77		4.134														L2	1						13.13	0.43016				4		9.264	0.549655							R3
	78	32.339									78	61.952																2						5.648					5		5.092
	79							9.138	0.460166		79							8.479	0.428824									3					174.701						6	45.138
	80							4.205			80							3.636										4						7.128	0.50463			L4	1		13.673	0.254443
	81						95.482				81						127.853											5						3.597					2		3.479
	82							10.48	0.441031		82							10.018	0.432422									6					167.989						3	60.086
	83							4.622			83							4.332										7						9.464	0.437342				4		11.155	0.437113
	84						122.643				84						135.908											8						4.139					5		4.876
	85		9.004	0.366393							85		6.969	0.724207														9					86.247						6	88.942
	86		3.299								86		5.047															10						5.452	0.491012				7							9.137	0.533654
	87	51.999									87	69.386																11						2.677					8							4.876
	88							8.59	0.487078		88		9.542	0.455041														12					146.021						9						122.558
	89							4.184			89		4.342															13						7.409	0.490215			L5	1		9.074	0.687018
	90						177.041				90	82.663																14						3.632					2		6.234
	91							8.303	0.602192		91							13.281	0.425119									15					92.351						3	52.927
	92							5			92							5.646										16						6.762	0.699793				4		8.62	0.570186							R4
	93						103.641				93						166.776											17						4.732					5		4.915
	94							6.046	0.568971		94		12.693	0.372883														18					172.907						6	63.902
	95							3.44			95		4.733														L3	1						8.473	0.301428				7		12.801	0.358409
	96						173.669				96	37.799																2						2.554					8		4.588
	97							6.299	0.603112		97		11.303	0.2878														3					134.534						9	74.675
	98							3.799			98		3.253															4		8.506	0.502822							L6	1							5.126	0.560086
	99						137.278				99	65.986																5		4.277									2							2.871
	100		7.93	0.535687							100		11.004															6	34.924										3						177.438
	101		4.248								101		6.026															7						6.177	0.587664				4							8.39	0.499285
	102	48.75									102	56.633																8						3.63					5							4.189
	103							7.663	0.652616		103		10.208	0.384796														9					114.484						6						121.023
	104							5.001			104		3.928														L4	1						8.009	0.376451				7							10.419	0.572992
	105						134.796				105	56.312																2						3.015					8							5.97
	106							7.904	0.516321		106							8.164	0.481994									3					178.515						9						172.015
	107							4.081			107							3.935										4						5.568	0.770654				10							7.051	0.490711
	108						90.31				108						100.847											5						4.291					11							3.46
	109		9.03	0.412625							109		9.399	0.425471														6					108.068						12						171.167
	110		3.726								110		3.999															7						5.095	0.808243				13		9.114	0.346171							R5
	111	28.708									111	77.155																8						4.118					14		3.155
	112							7.527	0.525043		112		11.683	0.391595														9					171.898						15	76.692
	113							3.952			113		4.575															1						7.21	0.468377			L7	1							8.969	0.495038
	114						106.728				114	69.33																2						3.377					2							4.44
	115							10.644	0.509301		115		8.79	0.493743														3					137.349						3						179.609
	116							5.421			116		4.34															4						8.152	0.654563				4		7.098	0.278247
	117						162.899				117	77.645																5						5.336					5		1.975
	118							6.271	0.765588		118		8.03	0.48543														6					163.62						6	76.11
	119							4.801			119		3.898															7						5.083	0.938816				7							7.981	0.741636
	120						101.282				120	28.344																8						4.772					8							5.919
		694.891		8.62824			3191.33		15.4156			1852.1		13.0983			1710.95		5.56603									9					175.909						9						159.37
		49.6351		0.616303			32.7435		0.592909			66.1466		0.467798			52.5794		0.463836								L5	1						7.263	0.661022				10							7.582	0.566737
L Final	WT											MUT																2						4.801					11							4.297
	Attached	Angle		Roundness		Unattached	Angle		Roundness			Attached	Angle		Roundness		Unattached	Angle		Roundness								3					177.303						12						156.984
		65.36		0.487386			54.502		0.476983				55.9523		0.594364			38.5741		0.584186								4						7.351	0.448646			L8	1		9.459	0.330162							R6
R Final	WT											MUT																5						3.298					2		3.123
	Attached	Angle		Roundness		Unattached	Angle		Roundness			Attached	Angle		Roundness		Unattached	Angle		Roundness								6					137.903						3	89.14
		67.8786		0.475928			65.3		0.441938				58.4861		0.552592			44.005		0.627426								7						6.691	0.643402				4							9.103	0.405471
																												8						4.305					5							3.691
																												9					153.065						6						147.867
																											L6	1						8.259	0.436251				7		9.761	0.381826							R7
L1 Final	WT											MUT																2						3.603					8		3.727
	Attached	Angle		Roundness		Unattached	Angle		Roundness			Attached	Angle		Roundness		Unattached	Angle		Roundness								3					100.945						9	82.44
		66.4099		0.443061			63.6888		0.498933				58.28		0.552613			35.4206		0.571728								4						7.006	0.678704				10		9.371	0.746345
R1 Final	WT											MUT																5						4.755					11		6.994
	Attached	Angle		Roundness		Unattached	Angle		Roundness			Attached	Angle		Roundness		Unattached	Angle		Roundness								6					98.065						12	68.681
		68.3937		0.454117			55.2686		0.535599				56.6934		0.641489			46.914		0.58111								7						7.045	0.626828				13		8.35	0.569461
																												8						4.416					14		4.755
																												9					71.558						15	64.623
	Average	67.0105		0.465123			59.6898		0.488363				57.353		0.585265			41.2284		0.591112								10						6.504	0.630381				16		10.826	0.431831							R8
	Stdev	1.38462		0.0201681			5.59543		0.0392756				1.23021		0.0423381			5.19009		0.0247818								11						4.1					17		4.675
																												12					13.549						18	64.213
																												13						5.625	0.801956				19		8.75	0.4824
																												14						4.511					20		4.221
							WT att	WT unatt	Mut att	Mut unatt																		15					28.468						21	53.639
	Pooled round	0.482184	0.589275			Angle	65.36	54.502	55.9523	44.005																	L7	1						8.918	0.629065				22		7.005	0.858672
		0.458933	0.590009				67.8786	65.3	58.4861	35.4206																		2						5.61					23		6.015
		0.470997	0.56217				66.4099	63.6888	58.28	38.5741																		3					52.088						24	4.332
		0.494858	0.6113				68.3937	55.2686	56.6934	46.914																		4						7.409	0.582535			L9	1		11.904	0.249496
		0.476743	0.588188																									5						4.316					2		2.97
		0.0153619	0.0201292																									6					91.173						3	83.476
	p-value	0.000119281					Wt att/ Mut un	Wt att /Mut att	Wt att/ Wtunatt	WT un/Mut att	Wt un/ Mut un	Mutatt / Mut un																7						6.611	0.56164				4		11.099	0.351203
						p-value	7.30916e-05	4.55772e-05	0.044077	0.445787	0.00288676	0.000926557																8						3.713					5		3.898
																												9					158.208						6	68.397
																											L8	1		9.278	0.5								7							7.314	0.652447		R9
																												2		4.639									8							4.772
						1	67.0105	0.465123																				3	44.206										9						93.237
						1	59.6898	0.488363																				4		10.324	0.6852								10							6.626	0.596136
						1	57.353	0.585265																				5		7.074									11							3.95
						1	41.2284	0.591112																				6	65.287										12						161.785
																												7						6.626	0.782674			L10	1							13.55	0.267528
							1.16955	1.19091																				8						5.186					2							3.625
							1.04178	0.967667																				9					93.56						3						157.264
							1.001	1.0849																			L9	1		7.988	0.585253								1							9.611	0.427635		R10
							0.719571	0.785962																				2		4.675									2							4.11
																												3	40.252										3						158.301
Extensions	Mut unnatached							Mutattatched																				4						6.245	0.586389				4							9.049	0.461487
1	1	0.377	4.496	3	6.704	98.427	3.165				1								1	0.323	3.978	2.408	6.544	-138.576	2.629			5						3.662					5							4.176
		0	0	0	0	90	0													0	0	0	0	178.668	0			6					131.302						6						178.531
	1	0.296	28.82	9.993	101.299	115.346	2.438						No Extensions	1													L10	1						8.878	0.475445				7		9.797	0.428805							R11
		0	0	0	0	154.804	0				2	1	0.296	1.905	0.889	3	-154.654	2.42										2						4.221					8		4.201
		0.659	18.535	6	65	87.614	5.571						0	0	0	0	143.707	0										3					172.379						9	48.913
		0	0	0	0	138.601	0					1	0.39	1.597	1	3	-64.359	3.216									L11	1		11.491	0.578105								10		8.966	0.482936
		0.484	21.844	12.4	36.343	-91.637	4.061						0	0	0	0	167.935	3.216										2		6.643									11		4.33
		0	0	0	0	136.946	0					1	0.296	5.522	3.583	6.819	-62.241	2.49										3	50.4										12	74.465
		No extensions	0										0	0	0	0	161.095	2.49										4						9.049	0.592441				1		11.163	0.288632
2				1	0.78	15.413	3.16	74.889	-66.14	6.578									1	0.632	6.319	4.435	10.251	-107.65	5.332			5						5.361					2		3.222
					0	0	0	0	128.934	0										0	0	0	0	98.878	0			6					114.76						3	69.775
					0.296	61.068	37.143	99.5	92.726	2.442			No Extensions	1													L12	1						7.889	0.646343				4		8.148	0.456308
					0	0	0	0	50.256	0	3		No Extensions	1														2						5.099					5		3.718
		No extesions	1								4								1	0.901	10.142	2	40.919	-19.537	7.629			3					110.516						6	50.845
3	1	0.377	38.338	19.074	66	109.799	3.081													0	0	0	0	177.259	0			4		9.103	0.736351								7							11.358	0.322856
		0	0	0	0	18.604	0												1	0.511	3.895	2.041	6	-38.418	4.292			5		6.703									8							3.667
		0.417	16.555	3	37.8	-93.814	3.487													0	0	0	0	162.763	0			6	52.366										9						169.739
		0	0	0	0	170.86	0						No Extensions	0														7		8.884	0.630009								10		10.214	0.390151
		No extensions	4								5	1	0.471	7.499	3.275	18.662	54.462	3.99										8		5.597									11		3.985
4	1	0.336	2.564	1.889	4.417	145.008	2.831						0	0	0	0	9.196	3.99										9	67.88										12	87.908
		0	0	0	0	176.647	0						No Extensions	0													L13	1		8.528	0.623945								1		12.624	0.329848
		0.256	2.675	1.333	5	153.435	2.075				6		No Extensions	3														2		5.321									2		4.164
		0	0	0	0	160.382	0				7	1	0.928	5.207	3.067	13.973	61.189	7.923										3	80.027										3	47.274
	1	0.484	6.611	3	17	180	4.059						0	0	0	0	173.649	0										4		8.467	0.488839								4		9.535	0.415102
		0	0	0	0	164.098	0						0.619	7.136	4.026	20.056	70.769	5.232										5		4.139									5		3.958
	1	0.417	4.785	2.96	6.68	152.592	3.527						0	0	0	0	156.168	0										6	81.163										6	72.913
		0	0	0	0	133.366	3.527						0.323	6.191	4.096	9.751	94.97	2.71										7						6.315	0.545368				7		9.144	0.381562							R13
	1	0.39	34.303	14.388	81.107	-46.469	3.199						0	0	0	0	132.502	0										8						3.444					8		3.489
		0	0	0	0	167.72	3.199					1	0.444	2.035	0.15	3.5	-123.69	3.763										9					149.292						9	78.69
		0.336	24.113	1.889	74.153	-34.992	2.831						0	0	0	0	177.606	3.763									L14	1						8.921	0.579756				10		10.092	0.368411
		0	0	0	0	154.113	3.527				8								1	0.659	5.969	3.954	8.028	62.904	5.567			2						5.172					11		3.718
		No extensions	5																	0	0	0	0	90.251	5.567			3					148.341						12	26.155
5				1	0.955	33.443	5.886	99.7	29.846	8.156										0.471	6.548	5.063	10.12	-112.751	3.949			4						7.205	0.563081				1							9.712	0.45624
					0	0	0	0	140.48	8.156										0	0	0	0	83.517	0			5						4.057					2							4.431
	1	0.43	52.775	29	81.383	-19.026	3.557													0.699	5.546	2.647	15.862	76.239	5.907			6					91.113						3						113.917
		0	0	0	0	169.048	0													0	0	0	0	59.984	0			7						8.698	0.608071				4		12.656	0.359355
		0.525	28.788	5.792	73	-109.855	4.439												1	0.363	1.601	1	2.231	-94.399	3.024			8						5.289					5		4.548
		0	0	0	0	108.896	0													0	0	0	0	161.565	3.024			9					164.028						6	35.97
	1	0.336	3.053	2	4.083	-114.444	2.803													0.296	2.125	1.286	4	60.945	2.388		L15	1						7.194	0.677231				1		12.328	0.379705							R14
		0	0	0	0	171.922	2.803													0	0	0	0	28.702	3.024			2						4.872					2		4.681
		No extensions	5																1	0.309	2.152	1	3.938	-110.854	2.606			3					90.205						3	84.815
6				1	0.403	1.505	0.583	2.587	56.31	3.345										0	0	0	0	159.58	2.606			4						6.565	0.633206				4		10.239	0.506495
					0	0	0	0	2.741	0			No Extensions	2														5						4.157					5		5.186
				1	0.444	4.013	1.234	8	16.189	3.743	9								1	0.457	3.926	1.663	6.677	-61.113	3.875			6					92.468						6	80.572
					0	0	0	0	146.233	3.533										0	0	0	0	170.298	0			7		9.48	0.398312
					0.417	3.186	1.4	4.64	23.962	3.426			No Extensions	0														8		3.776
					0	0	0	0	136.042	0	10								1	0.39	3.199	1.167	4.833	8.13	3.292			9	49.75
	1	0.444	4.013	1.234	8	16.189	3.743													0	0	0	0	95.76	3.292			10						11.777	0.246752														R15
		0	0	0	0	146.233	3.533						No Extensions	1														11						2.906
		0.417	3.186	1.4	4.64	23.962	3.426																					12					100.67
		0	0	0	0	136.042	0
	1	1.345	2.88	1	5.701	-120.964	11.496																						641.08		6.07874		5142.24		23.4408					2191.53		14.621			2612.71		8.48185
		0	0	0	0	81.229	0																						58.28		0.552613		35.4206		0.571728					66.4099		0.443061			63.6888		0.498933
		No extensions	0
7	1	0.511	6.221	2.378	12.27	93.094	4.297
		0	0	0	0	113.354	0
	1	0.323	3.415	1	6.896	64.537	2.697
		0	0	0	0	157.556	2.697
	1	0.39	86.345	8	171	-90	3.247
		0	0	0	0	174.752	0
		No extensions	1
8	1	0.498	3.223	2.222	5	78.69	4.139
		0	0	0	0	93.262	0
		0.457	2.723	1.347	5.507	-15.709	3.855
		0	0	0	0	158.724	0
	1	0.296	3.264	2	4.762	-95.44	2.446
		0	0	0	0	15.03	2.446
				1	0.242	3.734	2.685	5.304	17.354	1.944
					0	0	0	0	163.772	2.446
	1	0.256	8.55	7	11	-86.82	2.091
		0	0	0	0	86.869	2.091
		No extensions	0
9	1	0.269	5.687	4	7.895	96.009	2.216
		0	0	0	0	114.944	2.216
		No extensions	1
10				1	0.377	3.789	2.815	5.37	-21.801	3.123
					0	0	0	0	168.69	3.123
		No extensions	0
																				78.244	2589.08
						125.443	4331.15									Total Cells	Total extensions		Extensions	Length	Angle
		Total Cells	Total extensions		Extensions	Length	Angle									23	20	Average	0.869565	3.9122	129.454
		36	34	Average	0.944444	3.6895	127.387											Unattached	8	3.968	140.232
				Unattached	26	3.64527	130.539											Attached	12	4.2075	122.269
				Attached	8	4.09463	117.144
1				1	0.274	12.14	7	19.63	38.157	2.139	1								1	0.563	3.399	1	10.895	77.8	4.587
					0	0	0	0	101.188	0										0	0	0	0	167.455	4.587
	1	0.577	12.555	7	19.333	-113.962	4.733												1	0.534	23.887	5	44.167	59.859	4.307
		0	0	0	0	100.401	4.733													0	0	0	0	162.408	0
		0.361	10.325	8.375	15	-143.616	2.835												1	0.404	4.207	1.374	10.605	-56.889	3.299
		0	0	0	0	69.166	0													0	0	0	0	114.044	0
		0.534	12.377	8.395	17.444	-153.435	4.298													0.52	3.304	1.786	5.333	173.29	4.192
		0	0	0	0	74.082	0													0	0	0	0	102.907	0
				1	0.765	9.696	4.166	15	-22.62	6.247									1	0.505	3.563	1	6.323	-74.745	4.109
					0	0	0	0	88.771	1.956										0	0	0	0	92.31	0
					0.289	2.88	2	3.895	-42.879	2.295										0.346	3.767	2.159	5.115	-109.983	2.737
					0	0	0	0	139.142	0										0	0	0	0	132.592	0
				1	0.794	15.877	11.667	22.481	-109.44	6.497									1	0.361	30.943	23.167	40	-131.634	2.893
					0	0	0	0	114.666	0										0	0	0	0	145.774	0
				1	0.505	85.246	22	119.311	-118.072	4.085										0.361	40.08	28.778	60.556	-82.875	2.901
					0	0	0	0	114.025	0										0	0	0	0	151.068	0
2		No extensions	4									1	0.361	30.943	23.167	40	-131.634	2.893
	1	0.361	16.01	10.407	26.037	160.017	2.888						0	0	0	0	145.774	0
		0	0	0	0	164.644	2.474						0.361	40.08	28.778	60.556	-82.875	2.901
	1	0.375	5.175	0	10.24	31.759	2.967						0	0	0	0	151.068	0
		0	0	0	0	52.778	0					1	1.111	30.179	18.667	42.649	-111.523	9.177
				1	0.953	18.47	12.231	28.769	11.482	7.846			0	0	0	0	56.558	0
					0	0	0	0	137.754	0
				1	0.447	6.635	1.818	15	-118.301	3.548			No Extensions	3
					0	0	0	0	118.774	0	2	1	1.155	8.544	1.314	23.384	121.464	9.437
		No extensions	5										0	0	0	0	172.372	0
3	1	0.779	14.031	7.205	19.846	-59.589	6.319												1	0.837	4.977	2.053	9.122	-40.711	6.815
		0	0	0	0	179.811	0													0	0	0	0	18.389	6.815
				1	0.88	19.385	10.805	30.96	-55.244	7.165									1	0.375	18.577	12	24	180	3.003
					0	0	0	0	122.763	0										0	0	0	0	97.921	0
				1	0.722	30.721	17.891	55.098	-144.058	5.936									1	0.635	20.043	6.445	33.72	32.574	5.132
					0	0	0	0	156.591	0										0	0	0	0	60.193	0
			41	1	0.346	49.293	7.599	121.964	106.928	2.789										0.736	11.15	2.053	29	39.369	6.061
					0	0	0	0	61.446	0										0	0	0	0	52.907	0
					0.332	31.103	16.667	67.667	-84.806	2.648										0.491	9.699	4.273	17	-25.017	3.977
					0	0	0	0	129.837	0										0	0	0	0	123.871	0
				1	0.563	80.654	38	174.271	-38.66	4.616										0.39	14.408	11	18.012	-72.255	3.153
					0	0	0	0	59.779	0										0	0	0	0	168.479	0
		No extensions	5																1	0.346	4.798	1.673	14	-149.036	2.802
4				1	0.563	2.336	1	7.016	-172.504	4.52										0	0	0	0	147.743	0
					0	0	0	0	167.288	0										0.779	4.8	1.535	9.586	106.39	6.387
				1	0.736	5.772	2.099	11.18	-157.557	5.979										0	0	0	0	101.145	0
					0	0	0	0	176.323	0										0.563	9.362	2.64	18.08	122.005	4.534
		No extensions	1																	0	0	0	0	117.951	0
5	1	0.794	6.903	2	21.556	7.386	6.547						No Extensions	1
		0	0	0	0	152.511	6.547				4								1	0.52	5.528	2.98	10.62	21.501	4.261
				1	0.621	4.759	1.873	9.571	19.29	5.091										0	0	0	0	143.159	0
					0	0	0	0	128.207	5.27										0.303	26.957	18.06	49.92	-45	2.379
					0.447	7.552	5.3	10.96	-107.241	3.648										0	0	0	0	83.569	0
					0	0	0	0	94.775	0										0.332	10.889	3.182	19.636	10.305	2.686
					0.736	17.482	12	27.222	-50.631	6.03										0	0	0	0	152.55	0
					0	0	0	0	133.558	0										0.476	29.25	18.938	42.625	-3.576	3.852
		No extensions	1																	0	0	0	0	118.74	0
6				1	0.52	27.835	16.673	42.286	-45	4.248									1	0.577	6.847	2	17.689	14.744	4.721
					0	0	0	0	147.222	0										0	0	0	0	154.44	0
				1	0.39	79.858	58.667	95.6	74.358	3.168										0.318	26.307	10.599	87	37.405	2.571
					0	0	0	0	106.206	3.168										0	0	0	0	147.995	0
	1	0.318	71.704	56	88.342	112.834	2.477												1	0.462	54.224	17.488	120.391	-20.772	3.726
		0	0	0	0	111.801	0													0	0	0	0	172.393	0
		No extensions	4																	0.404	59.198	28	106	-2.121	3.246
7	1	0.52	10.653	4.667	18.751	131.496	4.224													0	0	0	0	166.145	0
		0	0	0	0	20.198	4.224												1	0.332	38.843	23.161	70	-20.854	2.7
		0.318	7.106	2.952	12	2.726	2.526													0	0	0	0	146.31	0
		0	0	0	0	138.37	0						No Extensions	3
	1	0.476	11.72	2.375	40.43	-20.136	3.839				6								1	0.52	34.273	21.509	67	28.74	4.248
		0	0	0	0	42.93	3.839													0	0	0	0	117.247	4.248
		0.303	6.438	5	7.6	-174.289	2.415				7	1	0.678	54.24	1.146	160	-132.357	5.528
		0	0	0	0	101.523	3.839						0	0	0	0	1.181	0
				1	0.751	1.721	1	3.667	-20.556	6.131			No Extensions	4
					0	0	0	0	155.638	6.131	8								1	0.318	25.815	18	31.449	-121.43	2.534
					0.274	4.09	2	6.5	42.709	2.125										0	0	0	0	119.959	0
					0	0	0	0	93.708	0									1	0.419	25.597	18.98	37.327	-147.995	3.4
			23	1	0.635	6.589	1.996	22.912	39.289	5.122										0	0	0	0	127.586	0
					0	0	0	0	90.47	0									1	0.419	6.037	3.25	8.411	47.862	3.402
					0.318	3.798	1.168	7.524	-120.069	2.583										0	0	0	0	98.973	0
					0	0	0	0	93.565	0		1	0.52	7.353	3.952	12.444	117.3	4.227
				1	0.722	4.33	1	10.423	-31.759	5.934			0	0	0	0	25.139	0
					0	0	0	0	172.008	0									1	0.346	20.555	15	26.89	64.537	2.794
				1	0.722	4.33	1	10.423	-31.759	5.934										0	0	0	0	169.593	0
					0	0	0	0	172.008	0										0.318	19.358	15	24.667	27.759	2.544
		No extensions	8																	0	0	0	0	149.909	0
8				1	0.635	6.241	2	12.395	3.991	5.178			No Extensions	2
					0	0	0	0	75.68	0	2016-05-02								1	0.548	23.009	18	30	-93.094	4.452
					0.39	5.029	2	8.087	164.358	3.119										0	0	0	0	177.817	0
					0	0	0	0	85.601	3.119		1	0.26	19.02	14.772	22.45	-118.072	2.042
				1	0.664	8.723	2	12.778	106.821	5.397			0	0	0	0	147.259	0
					0	0	0	0	117.408	0			0.274	11.345	5	25	-6.34	2.176
					0.447	11.374	6	14.467	7.595	3.636			0	0	0	0	74.327	0
					0	0	0	0	98.881	0									1	0.346	26.351	18	45	-80.134	2.805
				1	0.996	2.188	0.438	4.36	-79.019	8.199										0	0	0	0	153.805	0
					0	0	0	0	101.709	0									1	1.01	21.727	4	58.736	78.366	8.341
					0.693	1.815	1	3	-60.709	5.671										0	0	0	0	158.102	0
					0	0	0	0	126.87	0									1	0.318	82.523	41.261	116.907	165.964	2.477
				1	0.447	7.729	1.787	13.884	-76.43	3.642										0	0	0	0	136.504	0
					0	0	0	0	127.41	0			No Extensions	0
					0.462	11.378	6	14.369	5.528	3.688	2016-05-03	1	0.505	67.868	20	90.955	-157.249	4.038
					0	0	0	0	80.789	0			0	0	0	0	149.821	0
	1	0.462	2.572	1	5	1.848	3.726												1	0.346	115.921	59.629	166.796	115.463	2.794
		0	0	0	0	59.203	0													0	0	0	0	121.557	0
		No extensions	4																1	0.274	64.219	20.333	147.037	146.31	2.166
11				1	0.462	2.572	1	5	1.848	3.726										0	0	0	0	171.741	2.166
					0	0	0	0	59.203	0										0.375	90.034	63.88	131	31.759	2.967
				1	0.491	11.855	6.052	17.107	-148.736	3.915										0	0	0	0	39.957	0
					0	0	0	0	9.111	0									1	0.274	2.52	1	4.889	-109.44	2.166
				1	1.371	3.704	1.012	10.667	88.172	11.298										0	0	0	0	158.078	0
					0	0	0	0	144.36	0										0.274	2.598	1.074	5.093	-33.69	2.166
	1	0.318	2.503	0	6.404	140.906	2.477													0	0	0	0	92.345	0
		0	0	0	0	71.824	0													0.346	4.451	2	7	-172.569	2.787
		No extensions	2																	0	0	0	0	97.813	0
12				1	0.39	9.192	4	13.154	-62.447	3.117		1	0.635	3.018	1.116	7	-66.448	5.111
					0	0	0	0	177.936	0			0	0	0	0	69.624	0
				1	0.707	17.196	10.365	29	118.706	5.753			No Extensions	1
					0	0	0	0	80.353	0	2016-05-04								1	0.765	19.052	2.327	38.615	-174.508	6.276
					0.346	19.371	16.503	24.074	-61.189	2.742										0	0	0	0	133.08	0
					0	0	0	0	72.344	0										0.462	18.451	10.806	28.717	-30.651	3.77
					0.447	11.677	9.267	13.733	-93.814	3.612										0	0	0	0	25.134	0
					0	0	0	0	115.883	0									1	0.823	27.3	3	49.458	56.592	6.764
				1	0.303	17.943	15	22.36	69.775	2.433										0	0	0	0	151.305	0
					0	0	0	0	90.719	0										0.505	24.255	6	33.896	153.435	4.03
				1	0.534	14.58	4.875	29.12	157.011	4.307										0	0	0	0	103.177	0
					0	0	0	0	147.526	0			No Extensions	0
		No extensions	2
						248.028	6126.74
		Total Cells	Total extensions		Extensions	Length	Angle										221.444	6739.26
		75	56	Average	0.746667	4.42907	109.406						Total Cells	Total extensions		Extensions	Length	Angle
				Attached	42	4.66088	113.988						47	56	Average	1.19149	3.95436	120.344
				Unattached	14	3.73364	95.6601								Unattached	10	4.753	99.3123
															Attached	46	3.78074	124.916
				MUT					WT
				Attached L	Attached A	Unattached E	Unattached A		Attached L	Attached A	Unattached E	Unattached A
			Replicate 1	4.09	117.14	3.65	130.54		4.21	122.27	3.97	140.23
			Replicate 2	4.66	113.99	3.73	95.66		3.78	124.92	4.75	99.12
				4.375	115.565	3.69	113.1		3.995	123.595	4.36	119.675
				0.403051	2.22739	0.0565685	24.6639		0.304056	1.87383	0.551543	29.0692
[truncated: 7 more columns]
