# Supplementary material for: Wnt11 directs nephron progenitor polarity and motile behavior ultimately determining nephron endowment
Source: eLife. 2018 Dec 5;7:e40392. doi: 10.7554/eLife.40392 (PMC6281319; doi:10.7554/eLife.40392)
Supplement: Figure 5—source data 1. [file elife-40392-fig5-data1.xlsx]

## Sheet: Sheet1
Wildtype			Mutant
Attached	Total Cells	Percent attached	Attached	Total Cells	Percent attached
324	395	0.820253	130	285	0.45614
318	364	0.873626	165	314	0.525478
328	338	0.970414	123	213	0.577465
240	322	0.745342	158	356	0.44382
1210	1419	0.852713	576	1168	0.493151
		0.0946446			0.0625237
			Ttest(2tailed)
			0.000810986
