# Supplementary material for: Wnt11 directs nephron progenitor polarity and motile behavior ultimately determining nephron endowment
Source: eLife. 2018 Dec 5;7:e40392. doi: 10.7554/eLife.40392 (PMC6281319; doi:10.7554/eLife.40392)
Supplement: Figure 6—source data 1. [file elife-40392-fig6-data1.xlsx]

## Sheet: RAW DATA
20hr movies were captured. At time-frame 10 the analysis was started. Cells that were attached were tracked and the timing from frame 10 to their detachment was measured. Subsequently the timing from detachment to reattachment was measured and measurements started again.
Tracking was performed manually using the section view.
This was pursued over frames 10-97																				for mutant video 290316 image 7 was used.
																				for wildtype video 140216 position5
Mutant	1 = attached	2 = unattached		3 = cell division		4 = cell death					5 = out of frame
Cell number	Cell ID	Source movie	Position	Frame number ->	10	11	12	13	14	15	16	17	18	19	20	21	22	23	24	25	26	27	28	29	30	31	32	33	34	35	36	37	38	39	40	41	42	43	44	45	46	47	48	49	50	51	52	53	54
1	mU1	290316 Wnt11mut E11_5 48-72hrs 1mg at e10	1		2	2	2	2	2	2	2	1	1	1	1	1	1	1	1	1	1	1	1	1	1	1	1	1	1	1	1	1	1	1	1	1	1	1	1	1	1	1	1	1	1	1	1	1	1
2	mU2	290316 Wnt11mut E11_5 48-72hrs 1mg at e10	1		2	2	2	2	2	1	1	1	1	1	1	1	1	1	1	1	1	1	1	1	1	1	1	1	2	2	2	2	2	2	2	2	2	2	2	2	2	2	2	2	2	2	2	2	2
3	mU3	290316 Wnt11mut E11_5 48-72hrs 1mg at e10	1		2	2	2	2	2	2	2	2	2	2	2	2	2	2	2	2	2	2	2	2	2	2	2	2	2	2	2	2	2	2	2	2	2	2	2	2	2	2	2	2	2	2	2	2	2
4	mU4	290316 Wnt11mut E11_5 48-72hrs 1mg at e10	1		2	2	2	2	2	2	2	2	2	2	2	2	2	2	2	2	2	2	2	2	2	2	2	2	2	2	2	2	2	2	2	2	2	2	2	2	2	2	2	2	2	2	2	2	2
5	mU5	290316 Wnt11mut E11_5 48-72hrs 1mg at e10	1		2	2	2	2	2	2	2	2	2	2	2	2	2	2	2	2	2	2	2	2	2	2	2	2	2	2	2	2	2	2	2	2	2	4	4	4	4	4	4	4	4	4	4	4	4
6	mU6	290316 Wnt11mut E11_5 48-72hrs 1mg at e10	1		2	2	2	2	2	2	2	2	2	2	2	2	2	2	2	2	2	2	2	2	2	2	2	2	2	2	2	2	2	2	2	2	2	2	2	2	2	2	2	2	2	2	2	2	2
1	mU7	290316 Wnt11mut E11_5 48-72hrs 1mg at e10	2		2	2	2	2	2	2	2	2	2	2	2	2	2	2	2	2	2	2	2	2	2	1	1	1	1	1	1	1	1	1	1	1	1	1	1	1	1	1	1	1	1	1	1	1	1
2	mU8	290316 Wnt11mut E11_5 48-72hrs 1mg at e10	2		2	2	2	1	1	1	1	1	1	1	1	1	1	1	1	1	1	1	1	1	1	1	1	1	1	1	1	1	1	1	1	1	1	1	1	1	1	1	1	1	1	1	1	1	1
1	mU9	290316 Wnt11mut E11_5 48-72hrs 1mg at e10	6		2	2	2	2	2	2	2	2	2	2	2	2	2	2	2	2	2	2	2	2	2	2	2	2	2	2	2	2	2	2	2	2	2	2	2	2	2	1	1	1	1	1	1	1	1
1	mU10	290316 Wnt11mut E11_5 48-72hrs 1mg at e10	8		2	2	2	2	2	2	2	2	2	2	2	2	2	2	2	2	2	2	2	2	2	2	2	2	2	2	2	2	2	2	2	2	2	2	2	2	2	2	2	2	2	2	2	2	1
1	mA1	290316 Wnt11mut E11_5 48-72hrs 1mg at e10	1		1	1	1	1	1	1	1	1	1	1	2	2	2	2	2	2	2	2	1	1	1	1	1	1	1	1	1	1	1	1	1	1	1	1	1	1	1	1	1	2	2	2	2	2	2
2	mA2	290316 Wnt11mut E11_5 48-72hrs 1mg at e10	1		1	1	1	1	1	1	1	1	1	1	1	1	1	1	1	1	1	1	1	1	1	1	1	1	1	1	1	1	1	1	1	1	1	1	1	1	1	1	1	1	1	1	1	1	1
3	mA3	290316 Wnt11mut E11_5 48-72hrs 1mg at e10	1		1	1	1	1	1	1	1	1	1	1	1	1	1	1	1	1	1	1	1	1	1	1	1	1	1	1	1	1	1	1	1	1	1	1	1	1	1	1	1	1	1	1	1	1	1
1	mA4	290316 Wnt11mut E11_5 48-72hrs 1mg at e10	2		1	1	1	1	1	1	1	1	1	1	1	1	1	1	1	1	1	1	1	1	1	1	1	1	1	1	1	1	1	1	1	1	1	1	1	1	1	1	1	1	1	1	1	1	1
2	mA5	290316 Wnt11mut E11_5 48-72hrs 1mg at e10	2		1	1	1	1	1	1	1	1	1	1	1	1	1	1	1	1	1	1	1	1	1	1	1	1	1	1	1	1	1	1	1	1	1	1	1	1	1	1	1	1	1	1	1	1	1
3	mA6	290316 Wnt11mut E11_5 48-72hrs 1mg at e10	2		1	1	1	1	1	1	1	1	1	1	1	1	1	1	1	1	1	1	1	1	1	1	1	1	1	1	1	1	1	1	1	1	1	1	1	1	1	1	1	1	1	1	1	1	1
4	mA7	290316 Wnt11mut E11_5 48-72hrs 1mg at e10	2		1	1	1	1	2	2	2	2	2	2	2	2	2	2	1	1	1	1	1	1	1	1	1	1	1	1	1	1	1	1	1	1	1	1	1	1	1	1	1	1	1	1	1	1	1
1	mA8	290316 Wnt11mut E11_5 48-72hrs 1mg at e10	3		1	1	1	1	1	1	1	1	1	1	1	1	1	1	2	2	2	2	2	2	2	2	2	2	2	2	2	1	1	1	1	1	1	1	1	1	2	2	2	2	2	2	2	2	2
2	mA9	290316 Wnt11mut E11_5 48-72hrs 1mg at e10	3		1	1	1	1	1	1	1	1	1	1	1	1	1	1	1	1	1	1	1	1	1	1	3	3	3	3	3	3	3	1	1	1	1	1	1	1	1	1	1	1	1	1	1	1	1
																																					1	1	1	1	1	1	1	1	1	1	1	1	1
1	mA10		6		1	1	1	1	1	1	1	1	1	1	1	1	1	1	1	1	1	1	1	1	1	3	3	3	3	3	3	3	3	3	3	3	3	3	3	3	3	3	3	3	3	3	3	3	3
																											2	2	2	2	2	2	2	2	2	2	2	2	2	2	2	2	2	2	2	2	2	2	2
2	mA11		6		1	1	1	1	1	1	1	1	1	1	1	1	1	1	1	1	1	1	1	1	1	1	1	1	1	1	1	1	1	1	1	1	1	1	1	1	1	1	1	1	1	1	1	1	1
1	mA12		8		1	1	1	1	1	1	1	1	1	1	1	1	1	1	1	1	1	1	1	1	1	1	1	1	1	1	1	1	1	1	1	1	1	1	1	1	1	1	1	1	1	1	1	1	2
Additional captured data in August 2016
Mutant	1 = attached	2 = unattached		3 = cell division		4 = cell death					5 = out of frame
Cell number	Cell ID	Source movie	Position	Frame number ->	10	11	12	13	14	15	16	17	18	19	20	21	22	23	24	25	26	27	28	29	30	31	32	33	34	35	36	37	38	39	40	41	42	43	44	45	46	47	48	49	50	51	52	53	54
	mA11	3Aug0216	1		1	1	1	1	1	1	1	1	1	1	1	1	1	1	1	1	1	1	1	1	1	1	1	2	2	2	2	2	2	2	2	2	2	2	2	2	2	2	2	2	2	2	2	2	2
data scanned and emailed		3Aug0217
	mA12	3Aug0218	1		1	1	1	1	1	1	1	1	1	1	1	1	1	1	1	1	1	1	1	1	1	1	1	1	1	1	1	1	1	1	1	1	1	1	1	1	1	1	1	1	1	1	1	1	1
	mA13	3Aug0219	2		1	1	1	1	1	1	1	1	1	1	1	1	1	1	1	1	1	1	1	1	1	1	1	1	1	1	1	1	1	1	1	1	1	1	1	1	1	1	1	1	1	1	1	1	1
	mA14	3Aug0220	2		1	1	1	1	1	1	1	1	1	1	1	1	1	1	1	1	1	1	1	1	1	1	1	1	1	1	1	1	1	1	1	1	1	1	1	1	1	1	1	1	1	1	2	3	3
		3Aug0221																																														3	3
	mA15	3Aug0222	2		1	1	1	1	1	1	1	1	1	1	1	1	1	1	1	1	1	1	1	1	1	1	1	1	1	1	1	1	1	1	1	1	1	1	1	1	1	1	1	1	2	2	2	3	3
		3Aug0223																																														3	3
		3Aug0224
	mU11	3Aug0225	1		2	2	2	2	2	2	2	2	2	2	2	2	2	3	3	3	3	3	3	3	3	3	3	3	3	3	3	3	3	3	3	3	3	3	3	3	3	3	3	3	3	3	3	3	3
		3Aug0226																3	3	3	3	3	3	3	3	3	3	3	3	3	3	3	3	3	3	3	3	3	3	3	3	3	3	3	3	3	3	3	3
	mU12	3Aug0227	1		2	2	2	2	2	2	2	2	2	2	2	2	2	2	2	2	2	2	2	2	2	2	2	2	2	2	2	2	2	2	2	2	2	2	2	2	2	2	2	2	2	2	2	2	2
	mU13	3Aug0228	1		2	2	2	2	2	2	2	2	2	2	2	2	2	2	2	2	2	2	2	2	2	2	2	2	2	2	2	2	2	2	2	2	2	2	2	2	2	2	2	2	2	2	2	2	2
	mU14	3Aug0229	2		2	2	2	2	2	2	2	2	2	2	2	2	2	2	2	2	2	2	2	2	2	2	2	2	2	2	2	2	2	2	2	2	2	3	3	3	3	3	3	3	3	3	3	3	3
		3Aug0230																																				3	3	3	3	3	3	3	3	3	3	3	3
	mU15	3Aug0231	2		2	2	2	2	2	2	2	2	2	2	2	2	2	2	2	2	2	2	2	2	2	2	2	2	2	2	2	2	2	2	2	2	2	2	2	2	2	2	2	2	2	2	2	2	2
	mU16	3Aug0232	2		2	2	2	2	2	2	2	2	2	2	2	2	2	2	2	2	2	2	2	2	2	2	2	2	2	2	2	2	2	2	2	2	2	2	2	2	2	2	2	2	2	2	2	2	2
Het	1 = attached	2 = unattached		3 = cell division		4 = cell death					5 = out of frame
Cell number		Source movie	Position	Frame number ->	10	11	12	13	14	15	16	17	18	19	20	21	22	23	24	25	26	27	28	29	30	31	32	33	34	35	36	37	38	39	40	41	42	43	44	45	46	47	48	49	50	51	52	53	54
1		12Feb2016 E11l5 1mg at e10, 10uM 4OH 1hr	1		1	1	1	1	1	1	1	1	1	1	1	1	1	1	1	1	1	1	1	1	1	1	1	1	1	1	1	1	1	1	1	1	1	1	1	1	1	1	1	1	1	1	1	1	1
2		12Feb2016 E11l5 1mg at e10, 10uM 4OH 1hr	1		1	1	1	1	1	1	1	1	1	1	1	1	1	1	1	1	1	1	1	1	1	1	1	1	1	1	1	1	1	1	1	1	1	1	1	1	1	1	1	1	1	1	1	1	1
3		12Feb2016 E11l5 1mg at e10, 10uM 4OH 1hr	1		1	1	1	1	1	1	1	1	1	1	1	1	1	1	1	1	1	1	1	1	1	1	1	1	1	1	1	1	1	1	1	1	1	1	1	1	1	1	1	1	1	1	1	1	1
1		13Feb2016 E11l5 1mg at e10, 10uM 4OH 1hr	5		1	1	1	1	1	1	1	1	1	1	1	1	1	1	1	1	1	1	1	1	1	1	1	1	1	1	1	1	1	1	1	1	1	1	1	1	1	1	1	1	1	1	1	1	1
2		13Feb2016 E11l5 1mg at e10, 10uM 4OH 1hr	5		1	1	1	1	1	1	1	1	1	1	1	1	1	1	1	1	1	1	1	1	1	1	1	1	1	1	1	1	1	1	1	1	1	1	1	1	1	1	1	1	1	1	1	1	1
1		14Feb2016 E11l5 1mg at e10, 10uM 4OH 1hr	4		1	1	1	1	1	1	1	1	1	1	1	1	1	1	1	1	1	1	1	1	1	1	1	1	1	1	1	1	1	1	1	1	1	1	1	1	1	1	1	1	1	1	1	1	1
2		14Feb2016 E11l5 1mg at e10, 10uM 4OH 1hr	4		1	1	1	1	1	1	1	1	1	1	1	1	1	1	1	1	1	1	1	1	1	1	1	1	1	1	1	1	1	1	1	1	1	1	1	1	1	1	1	1	1	1	1	1	1
3		14Feb2016 E11l5 1mg at e10, 10uM 4OH 1hr	4		1	1	1	1	1	1	1	1	1	1	1	1	1	1	1	1	1	1	1	1	1	1	1	1	1	1	1	1	1	1	1	1	1	1	1	1	1	1	1	1	1	1	1	1	1
1		14Feb2016 E11l5 1mg at e10, 10uM 4OH 1hr	5		1	1	1	1	1	1	1	1	1	1	1	1	1	1	1	1	1	1	1	1	1	1	1	1	1	1	1	1	1	1	1	1	1	1	1	1	1	1	1	1	1	1	1	1	1
2		14Feb2016 E11l5 1mg at e10, 10uM 4OH 1hr	5		1	1	1	1	1	1	1	1	1	1	1	1	1	1	1	1	1	1	1	1	1	1	1	1	1	1	1	1	1	1	1	1	1	1	1	1	1	1	1	1	1	1	1	1	1
3		14Feb2016 E11l5 1mg at e10, 10uM 4OH 1hr	5		1	1	1	1	1	1	1	1	1	1	1	1	1	1	1	1	1	1	1	1	1	1	1	1	1	1	1	1	1	1	1	1	1	1	1	1	1	1	1	1	1	1	1	1	1
[truncated: 43 more columns]

## Sheet: ANALYSIS
20hr movies were captured. At time-frame 10 the analysis was started. Cells that were attached were tracked and the timing from frame 10 to their detachment was measured. Subsequently the timing from detachment to reattachment was measured and measurements started again.
Tracking was performed manually using the section view.
This was pursued over frames 10-
Mutant	1 = attached	2 = unattached		3 = cell division		4 = cell death					5 = out of frame
Cell number	Cell ID	Source movie	Position	Frame number ->	10	11	12	13	14	15	16	17	18	19	20	21	22	23	24	25	26	27	28	29	30	31	32	33	34	35	36	37	38	39	40	41	42	43	44	45	46	47	48	49	50	51	52	53	54
1	mU1	290316 Wnt11mut E11_5 48-72hrs 1mg at e10	1		2	2	2	2	2	2	2	1	1	1	1	1	1	1	1	1	1	1	1	1	1	1	1	1	1	1	1	1	1	1	1	1	1	1	1	1	1	1	1	1	1	1	1	1	1
2	mU2	290316 Wnt11mut E11_5 48-72hrs 1mg at e10	1		2	2	2	2	2	1	1	1	1	1	1	1	1	1	1	1	1	1	1	1	1	1	1	1	2	2	2	2	2	2	2	2	2	2	2	2	2	2	2	2	2	2	2	2	2
3	mU3	290316 Wnt11mut E11_5 48-72hrs 1mg at e10	1		2	2	2	2	2	2	2	2	2	2	2	2	2	2	2	2	2	2	2	2	2	2	2	2	2	2	2	2	2	2	2	2	2	2	2	2	2	2	2	2	2	2	2	2	2
4	mU4	290316 Wnt11mut E11_5 48-72hrs 1mg at e10	1		2	2	2	2	2	2	2	2	2	2	2	2	2	2	2	2	2	2	2	2	2	2	2	2	2	2	2	2	2	2	2	2	2	2	2	2	2	2	2	2	2	2	2	2	2
5	mU5	290316 Wnt11mut E11_5 48-72hrs 1mg at e10	1		2	2	2	2	2	2	2	2	2	2	2	2	2	2	2	2	2	2	2	2	2	2	2	2	2	2	2	2	2	2	2	2	2	4	4	4	4	4	4	4	4	4	4	4	4
6	mU6	290316 Wnt11mut E11_5 48-72hrs 1mg at e10	1		2	2	2	2	2	2	2	2	2	2	2	2	2	2	2	2	2	2	2	2	2	2	2	2	2	2	2	2	2	2	2	2	2	2	2	2	2	2	2	2	2	2	2	2	2
1	mU7	290316 Wnt11mut E11_5 48-72hrs 1mg at e10	2		2	2	2	2	2	2	2	2	2	2	2	2	2	2	2	2	2	2	2	2	2	1	1	1	1	1	1	1	1	1	1	1	1	1	1	1	1	1	1	1	1	1	1	1	1
2	mU8	290316 Wnt11mut E11_5 48-72hrs 1mg at e10	2		2	2	2	1	1	1	1	1	1	1	1	1	1	1	1	1	1	1	1	1	1	1	1	1	1	1	1	1	1	1	1	1	1	1	1	1	1	1	1	1	1	1	1	1	1
1	mU9	290316 Wnt11mut E11_5 48-72hrs 1mg at e10	6		2	2	2	2	2	2	2	2	2	2	2	2	2	2	2	2	2	2	2	2	2	2	2	2	2	2	2	2	2	2	2	2	2	2	2	2	2	1	1	1	1	1	1	1	1
1	mU10	290316 Wnt11mut E11_5 48-72hrs 1mg at e10	8		2	2	2	2	2	2	2	2	2	2	2	2	2	2	2	2	2	2	2	2	2	2	2	2	2	2	2	2	2	2	2	2	2	2	2	2	2	2	2	2	2	2	2	2	1
	mU11	3Aug0225	1		2	2	2	2	2	2	2	2	2	2	2	2	2	3	3	3	3	3	3	3	3	3	3	3	3	3	3	3	3	3	3	3	3	3	3	3	3	3	3	3	3	3	3	3	3
		3Aug0226																3	3	3	3	3	3	3	3	3	3	3	3	3	3	3	3	3	3	3	3	3	3	3	3	3	3	3	3	3	3	3	3
	mU12	3Aug0227	1		2	2	2	2	2	2	2	2	2	2	2	2	2	2	2	2	2	2	2	2	2	2	2	2	2	2	2	2	2	2	2	2	2	2	2	2	2	2	2	2	2	2	2	2	2
	mU13	3Aug0228	1		2	2	2	2	2	2	2	2	2	2	2	2	2	2	2	2	2	2	2	2	2	2	2	2	2	2	2	2	2	2	2	2	2	2	2	2	2	2	2	2	2	2	2	2	2
	mU14	3Aug0229	2		2	2	2	2	2	2	2	2	2	2	2	2	2	2	2	2	2	2	2	2	2	2	2	2	2	2	2	2	2	2	2	2	2	3	3	3	3	3	3	3	3	3	3	3	3
		3Aug0230																																				3	3	3	3	3	3	3	3	3	3	3	3
	mU15	3Aug0231	2		2	2	2	2	2	2	2	2	2	2	2	2	2	2	2	2	2	2	2	2	2	2	2	2	2	2	2	2	2	2	2	2	2	2	2	2	2	2	2	2	2	2	2	2	2
	mU16	3Aug0232	2		2	2	2	2	2	2	2	2	2	2	2	2	2	2	2	2	2	2	2	2	2	2	2	2	2	2	2	2	2	2	2	2	2	2	2	2	2	2	2	2	2	2	2	2	2
1	mA1	290316 Wnt11mut E11_5 48-72hrs 1mg at e10	1		1	1	1	1	1	1	1	1	1	1	2	2	2	2	2	2	2	2	1	1	1	1	1	1	1	1	1	1	1	1	1	1	1	1	1	1	1	1	1	2	2	2	2	2	2
2	mA2	290316 Wnt11mut E11_5 48-72hrs 1mg at e10	1		1	1	1	1	1	1	1	1	1	1	1	1	1	1	1	1	1	1	1	1	1	1	1	1	1	1	1	1	1	1	1	1	1	1	1	1	1	1	1	1	1	1	1	1	1
3	mA3	290316 Wnt11mut E11_5 48-72hrs 1mg at e10	1		1	1	1	1	1	1	1	1	1	1	1	1	1	1	1	1	1	1	1	1	1	1	1	1	1	1	1	1	1	1	1	1	1	1	1	1	1	1	1	1	1	1	1	1	1
1	mA4	290316 Wnt11mut E11_5 48-72hrs 1mg at e10	2		1	1	1	1	1	1	1	1	1	1	1	1	1	1	1	1	1	1	1	1	1	1	1	1	1	1	1	1	1	1	1	1	1	1	1	1	1	1	1	1	1	1	1	1	1
2	mA5	290316 Wnt11mut E11_5 48-72hrs 1mg at e10	2		1	1	1	1	1	1	1	1	1	1	1	1	1	1	1	1	1	1	1	1	1	1	1	1	1	1	1	1	1	1	1	1	1	1	1	1	1	1	1	1	1	1	1	1	1
3	mA6	290316 Wnt11mut E11_5 48-72hrs 1mg at e10	2		1	1	1	1	1	1	1	1	1	1	1	1	1	1	1	1	1	1	1	1	1	1	1	1	1	1	1	1	1	1	1	1	1	1	1	1	1	1	1	1	1	1	1	1	1
4	mA7	290316 Wnt11mut E11_5 48-72hrs 1mg at e10	2		1	1	1	1	2	2	2	2	2	2	2	2	2	2	1	1	1	1	1	1	1	1	1	1	1	1	1	1	1	1	1	1	1	1	1	1	1	1	1	1	1	1	1	1	1
1	mA8	290316 Wnt11mut E11_5 48-72hrs 1mg at e10	3		1	1	1	1	1	1	1	1	1	1	1	1	1	1	2	2	2	2	2	2	2	2	2	2	2	2	2	1	1	1	1	1	1	1	1	1	2	2	2	2	2	2	2	2	2
2	mA9	290316 Wnt11mut E11_5 48-72hrs 1mg at e10	3		1	1	1	1	1	1	1	1	1	1	1	1	1	1	1	1	1	1	1	1	1	1	3	3	3	3	3	3	3	1	1	1	1	1	1	1	1	1	1	1	1	1	1	1	1
																																					1	1	1	1	1	1	1	1	1	1	1	1	1
1	mA10		6		1	1	1	1	1	1	1	1	1	1	1	1	1	1	1	1	1	1	1	1	1	3	3	3	3	3	3	3	3	3	3	3	3	3	3	3	3	3	3	3	3	3	3	3	3
																											2	2	2	2	2	2	2	2	2	2	2	2	2	2	2	2	2	2	2	2	2	2	2
2	mA11		6		1	1	1	1	1	1	1	1	1	1	1	1	1	1	1	1	1	1	1	1	1	1	1	1	1	1	1	1	1	1	1	1	1	1	1	1	1	1	1	1	1	1	1	1	1
1	mA12		8		1	1	1	1	1	1	1	1	1	1	1	1	1	1	1	1	1	1	1	1	1	1	1	1	1	1	1	1	1	1	1	1	1	1	1	1	1	1	1	1	1	1	1	1	2
	mA13	3Aug0216	1		1	1	1	1	1	1	1	1	1	1	1	1	1	1	1	1	1	1	1	1	1	1	1	2	2	2	2	2	2	2	2	2	2	2	2	2	2	2	2	2	2	2	2	2	2
data scanned and emailed		3Aug0217
	mA14	3Aug0218	1		1	1	1	1	1	1	1	1	1	1	1	1	1	1	1	1	1	1	1	1	1	1	1	1	1	1	1	1	1	1	1	1	1	1	1	1	1	1	1	1	1	1	1	1	1
	mA15	3Aug0219	2		1	1	1	1	1	1	1	1	1	1	1	1	1	1	1	1	1	1	1	1	1	1	1	1	1	1	1	1	1	1	1	1	1	1	1	1	1	1	1	1	1	1	1	1	1
	mA16	3Aug0220	2		1	1	1	1	1	1	1	1	1	1	1	1	1	1	1	1	1	1	1	1	1	1	1	1	1	1	1	1	1	1	1	1	1	1	1	1	1	1	1	1	1	1	2	3	3
		3Aug0221																																														3	3
	mA17	3Aug0222	2		1	1	1	1	1	1	1	1	1	1	1	1	1	1	1	1	1	1	1	1	1	1	1	1	1	1	1	1	1	1	1	1	1	1	1	1	1	1	1	1	2	2	2	3	3
		3Aug0223																																														3	3
Het	1 = attached	2 = unattached		3 = cell division		4 = cell death					5 = out of frame
Cell number	Cell ID	Source movie	Position	Frame number ->	10	11	12	13	14	15	16	17	18	19	20	21	22	23	24	25	26	27	28	29	30	31	32	33	34	35	36	37	38	39	40	41	42	43	44	45	46	47	48	49	50	51	52	53	54
1	wt1	12Feb2016 E11l5 1mg at e10, 10uM 4OH 1hr	1		1	1	1	1	1	1	1	1	1	1	1	1	1	1	1	1	1	1	1	1	1	1	1	1	1	1	1	1	1	1	1	1	1	1	1	1	1	1	1	1	1	1	1	1	1
2	wt2	12Feb2016 E11l5 1mg at e10, 10uM 4OH 1hr	1		1	1	1	1	1	1	1	1	1	1	1	1	1	1	1	1	1	1	1	1	1	1	1	1	1	1	1	1	1	1	1	1	1	1	1	1	1	1	1	1	1	1	1	1	1
3	wt3	12Feb2016 E11l5 1mg at e10, 10uM 4OH 1hr	1		1	1	1	1	1	1	1	1	1	1	1	1	1	1	1	1	1	1	1	1	1	1	1	1	1	1	1	1	1	1	1	1	1	1	1	1	1	1	1	1	1	1	1	1	1
1	wt4	13Feb2016 E11l5 1mg at e10, 10uM 4OH 1hr	5		1	1	1	1	1	1	1	1	1	1	1	1	1	1	1	1	1	1	1	1	1	1	1	1	1	1	1	1	1	1	1	1	1	1	1	1	1	1	1	1	1	1	1	1	1
2	wt5	13Feb2016 E11l5 1mg at e10, 10uM 4OH 1hr	5		1	1	1	1	1	1	1	1	1	1	1	1	1	1	1	1	1	1	1	1	1	1	1	1	1	1	1	1	1	1	1	1	1	1	1	1	1	1	1	1	1	1	1	1	1
1	wt6	14Feb2016 E11l5 1mg at e10, 10uM 4OH 1hr	4		1	1	1	1	1	1	1	1	1	1	1	1	1	1	1	1	1	1	1	1	1	1	1	1	1	1	1	1	1	1	1	1	1	1	1	1	1	1	1	1	1	1	1	1	1
2	wt7	14Feb2016 E11l5 1mg at e10, 10uM 4OH 1hr	4		1	1	1	1	1	1	1	1	1	1	1	1	1	1	1	1	1	1	1	1	1	1	1	1	1	1	1	1	1	1	1	1	1	1	1	1	1	1	1	1	1	1	1	1	1
3	wt8	14Feb2016 E11l5 1mg at e10, 10uM 4OH 1hr	4		1	1	1	1	1	1	1	1	1	1	1	1	1	1	1	1	1	1	1	1	1	1	1	1	1	1	1	1	1	1	1	1	1	1	1	1	1	1	1	1	1	1	1	1	1
	wt8_2
1	wt9	14Feb2016 E11l5 1mg at e10, 10uM 4OH 1hr	5		1	1	1	1	1	1	1	1	1	1	1	1	1	1	1	1	1	1	1	1	1	1	1	1	1	1	1	1	1	1	1	1	1	1	1	1	1	1	1	1	1	1	1	1	1
2	wt10	14Feb2016 E11l5 1mg at e10, 10uM 4OH 1hr	5		1	1	1	1	1	1	1	1	1	1	1	1	1	1	1	1	1	1	1	1	1	1	1	1	1	1	1	1	1	1	1	1	1	1	1	1	1	1	1	1	1	1	1	1	1
	wt10_2
3	wt11	14Feb2016 E11l5 1mg at e10, 10uM 4OH 1hr	5		1	1	1	1	1	1	1	1	1	1	1	1	1	1	1	1	1	1	1	1	1	1	1	1	1	1	1	1	1	1	1	1	1	1	1	1	1	1	1	1	1	1	1	1	1
[truncated: 133 more columns]

## Sheet: probility of attachment
		Cell ID	number of changes			Het	Wnt11 attached	Wnt11 unattached			Het		Wnt11 attached		Wnt11 unattached
		mU1	4			0	2	4
		mU2	4			0	1	4			Mean	0.363636	Mean	2.42857	Mean	1.69231
		mU3	0			0	1	0			Standard Error	0.243935	Standard Error	0.531577	Standard Error	0.398468
		mU4	3			0	0	3			Median	0	Median	2	Median	1
		mU5				0	4	1			Mode	0	Mode	2	Mode	1
		mU6	1			0	3	2			Standard Deviation	0.80904	Standard Deviation	1.98898	Standard Deviation	1.4367
		mU7	2			0	2	1			Sample Variance	0.654545	Sample Variance	3.95604	Sample Variance	2.0641
		mU8	1			2	3	3			Kurtosis	2.03704	Kurtosis	4.35467	Kurtosis	-1.0758
		mU9	3			0	8	2			Skewness	1.92272	Skewness	1.62842	Skewness	0.439791
		mU10	2			2	2	1			Range	2	Range	8	Range	4
		mU11	1			0	3	0			Minimum	0	Minimum	0	Minimum	0
		mU12	0				0	0			Maximum	2	Maximum	8	Maximum	4
		mU13	0				3	1			Sum	4	Sum	34	Sum	22
		mU14	1				2				Count	11	Count	14	Count	13
		mU15									Confidence Level(95.0%)	0.54352	Confidence Level(95.0%)	1.1484	Confidence Level(95.0%)	0.868188
		mU16
		mA1
		mA2	2
		mA3	1
		mA4	1
		mA5	0
		mA6	4
		mA7
		mA8	3				t-Test: Two-Sample Assuming Equal Variances				t-Test: Two-Sample Assuming Equal Variances				t-Test: Two-Sample Assuming Equal Variances
		mA9	2
		mA10	3					Het	Wnt11 attached			Het	Wnt11 unattached		t-Test: Two-Sample Assuming Equal Variances
		mA11	8				Mean	0.363636	2.42857		Mean	0.363636	1.69231
		mA12	2				Variance	0.654545	3.95604		Variance	0.654545	2.0641			Wnt11 attached	Wnt11 unattached
		mA13	3				Observations	11	14		Observations	11	13		Mean	2.42857	1.69231
		mA14	0				Pooled Variance	2.52061			Pooled Variance	1.42339			Variance	3.95604	2.0641
		mA15	3				Hypothesized Mean Difference	0			Hypothesized Mean Difference	0			Observations	14	13
		mA16					df	23			df	22			Pooled Variance	3.04791
		mA17	2				t Stat	-3.22808			t Stat	-2.71842			Hypothesized Mean Difference	0
		wt1	0				P(T<=t) one-tail	0.00186012			P(T<=t) one-tail	0.00627415			df	25
		wt2	0				t Critical one-tail	1.71387			t Critical one-tail	1.71714			t Stat	1.09493
		wt3	0				P(T<=t) two-tail	0.00372024			P(T<=t) two-tail	0.0125483			P(T<=t) one-tail	0.141992
		wt4	0				t Critical two-tail	2.06866			t Critical two-tail	2.07387			t Critical one-tail	1.70814
		wt5	0												P(T<=t) two-tail	0.283985
		wt6	0												t Critical two-tail	2.05954
		wt7	0
		wt8	2
		wt9	0
		wt10	2
		wt11	0
